# Supplementary material for: Safety outcomes and immunological correlates in a prospective clinical trial of immune checkpoint therapy plus debulking surgery for patients with metastatic renal cell carcinoma
Source: Research Square preprint supplement (doi:10.21203/rs.3.rs-4331053/v1), 2024-11-12
Supplement: Supplementary file 1 [file 3b2815adeb086e418e0cdbe6.xlsx]

## Sheet: cDC_vs_other_monocytic_myelo
gene	p_val	avg_log2FC	pct.1	pct.2	p_val_adj
SIGLEC6	0	9.95804	0.102	0	0
DNASE1L3	1.36708e-185	8.31084	0.045	0	2.85378e-181
BEND6	7.7029e-170	7.86534	0.037	0	1.60798e-165
FBLN2	0	7.82552	0.142	0	0
FCER1A	0	7.39775	0.825	0.023	0
TLR3	2.04702e-184	7.19276	0.043	0	4.27315e-180
SLC4A3	0	7.11993	0.091	0	0
CLEC9A	7.5871e-34	7.06308	0.01	0	1.58381e-29
ENHO	0	6.97933	0.558	0.009	0
NCKAP5	8.50916e-203	6.93347	0.047	0	1.77629e-198
MSLN	3.4787e-64	6.92949	0.014	0	7.26178e-60
MRC1	0	6.82215	0.181	0.001	0
PPP1R14A	0	6.71795	0.178	0.001	0
LAYN	0	6.70896	0.075	0	0
AC092809.2	2.82321e-223	6.57887	0.054	0	5.89344e-219
LINC02014	4.15652e-14	6.53451	0.003	0	8.67674e-10
AC134312.5	2.00856e-33	6.51574	0.008	0	4.19288e-29
LRP1B	4.14603e-166	6.51307	0.043	0	8.65484e-162
NPIPA2	9.15903e-08	6.44149	0.001	0	0.00191195
AL121787.1	3.4787e-64	6.44056	0.014	0	7.26178e-60
CD1E	0	6.23726	0.184	0.003	0
AL591115.1	2.15352e-20	6.22656	0.004	0	4.49548e-16
NYNRIN	4.15652e-14	6.16669	0.003	0	8.67674e-10
AC011503.1	9.15903e-08	6.08475	0.001	0	0.00191195
HHIP-AS1	4.15652e-14	6.05598	0.003	0	8.67674e-10
IGHJ3	9.15903e-08	6.04751	0.001	0	0.00191195
CD1C	0	6.03428	0.699	0.037	0
KIF17	2.60527e-77	6.01885	0.018	0	5.43849e-73
DPF1	9.15903e-08	5.99939	0.001	0	0.00191195
COL1A1	4.15652e-14	5.89994	0.003	0	8.67674e-10
AL031963.1	9.15903e-08	5.86148	0.001	0	0.00191195
VXN	9.15903e-08	5.83366	0.001	0	0.00191195
FBXO27	2.68113e-21	5.83047	0.005	0	5.59686e-17
AL031985.3	9.15903e-08	5.8125	0.001	0	0.00191195
SLC30A10	9.15903e-08	5.77907	0.001	0	0.00191195
AL445228.2	9.15903e-08	5.75752	0.001	0	0.00191195
LINC01724	4.15652e-14	5.75395	0.003	0	8.67674e-10
AC021723.2	9.15903e-08	5.75288	0.001	0	0.00191195
FOXB1	9.15903e-08	5.72966	0.001	0	0.00191195
AP002884.3	9.15903e-08	5.7253	0.001	0	0.00191195
ZCCHC12	9.15903e-08	5.72422	0.001	0	0.00191195
SCARA5	9.15903e-08	5.70754	0.001	0	0.00191195
AL513493.1	9.15903e-08	5.70289	0.001	0	0.00191195
HOXB-AS3	9.15903e-08	5.69405	0.001	0	0.00191195
LINC01819	9.15903e-08	5.68171	0.001	0	0.00191195
RPRM	9.15903e-08	5.6812	0.001	0	0.00191195
TMEM225B	9.15903e-08	5.61174	0.001	0	0.00191195
LINC02145	9.15903e-08	5.61174	0.001	0	0.00191195
AL592430.1	2.68113e-21	5.61037	0.005	0	5.59686e-17
SCHIP1	9.15903e-08	5.59389	0.001	0	0.00191195
AC134312.4	9.15903e-08	5.58212	0.001	0	0.00191195
AL157813.2	9.15903e-08	5.58101	0.001	0	0.00191195
AC090510.1	9.15903e-08	5.57515	0.001	0	0.00191195
ZNF723	9.15903e-08	5.56641	0.001	0	0.00191195
AVPR1A	9.15903e-08	5.55704	0.001	0	0.00191195
TEX53	9.15903e-08	5.55021	0.001	0	0.00191195
AC004706.1	9.15903e-08	5.5474	0.001	0	0.00191195
RUNDC3A-AS1	9.15903e-08	5.54604	0.001	0	0.00191195
ARL14EPL	9.15903e-08	5.5445	0.001	0	0.00191195
AL133405.1	9.15903e-08	5.54415	0.001	0	0.00191195
LINC00472	9.15903e-08	5.53935	0.001	0	0.00191195
LINC01976	9.15903e-08	5.52645	0.001	0	0.00191195
AC004223.4	9.15903e-08	5.51159	0.001	0	0.00191195
ERBB3	9.15903e-08	5.50713	0.001	0	0.00191195
AC093817.2	9.15903e-08	5.50305	0.001	0	0.00191195
COL28A1	9.15903e-08	5.48191	0.001	0	0.00191195
FGFR2	9.15903e-08	5.48174	0.001	0	0.00191195
SEMA3G	9.15903e-08	5.4577	0.001	0	0.00191195
IFNL1	1.56091e-60	5.45461	0.015	0	3.25841e-56
ALG1L	9.15903e-08	5.44941	0.001	0	0.00191195
AC096586.1	9.15903e-08	5.43465	0.001	0	0.00191195
CLDN1	9.15903e-08	5.42816	0.001	0	0.00191195
MIR924HG	1.34843e-09	5.42792	0.003	0	2.81484e-05
AC092969.1	9.15903e-08	5.42117	0.001	0	0.00191195
C19orf81	7.33174e-42	5.41483	0.013	0	1.5305e-37
TTLL8	9.15903e-08	5.41077	0.001	0	0.00191195
CLNK	2.09876e-100	5.40806	0.033	0.001	4.38117e-96
ADGRG6	1.33761e-98	5.40005	0.029	0	2.79225e-94
CLEC10A	0	5.39439	0.769	0.055	0
AC040168.1	9.15903e-08	5.38285	0.001	0	0.00191195
AC020914.1	9.15903e-08	5.3742	0.001	0	0.00191195
ANKRD20A3	9.15903e-08	5.36699	0.001	0	0.00191195
BEND5	1.46225e-261	5.36472	0.07	0.001	3.05244e-257
ZNF462	9.15903e-08	5.35068	0.001	0	0.00191195
ALOX15	2.4726e-27	5.34689	0.006	0	5.16155e-23
AP005901.5	9.15903e-08	5.34625	0.001	0	0.00191195
CYP2E1	5.01203e-117	5.34617	0.036	0.001	1.04626e-112
CU638689.5	9.15903e-08	5.32326	0.001	0	0.00191195
Z93403.1	9.15903e-08	5.3077	0.001	0	0.00191195
AC129492.1	9.15903e-08	5.30152	0.001	0	0.00191195
AL450311.1	2.68663e-21	5.29727	0.005	0	5.60834e-17
ERFE	9.15903e-08	5.2931	0.001	0	0.00191195
ANKRD65	4.36517e-55	5.16629	0.018	0	9.1123e-51
LINC02381	2.86176e-55	5.13674	0.019	0	5.97391e-51
TMEM14A	9.36362e-202	5.1317	0.069	0.001	1.95466e-197
ITM2C	0	5.09196	0.356	0.01	0
RAG1	0.000266627	5.07683	0.001	0	1
B3GNT7	1.16944e-66	5.07316	0.019	0	2.44121e-62
AC008655.2	1.35074e-09	5.07134	0.003	0	2.81968e-05
AC079089.1	2.53894e-12	5.05314	0.004	0	5.30003e-08
AC009097.1	0.000266627	5.05173	0.001	0	1
SAMD12-AS1	0.000266627	5.04241	0.001	0	1
HMSD	2.35971e-15	4.99849	0.004	0	4.9259e-11
OXCT1-AS1	0.000266627	4.93795	0.001	0	1
PKIB	0	4.91973	0.331	0.01	0
PALD1	5.39224e-202	4.90354	0.059	0.001	1.12563e-197
NAP1L3	4.96719e-05	4.89795	0.003	0	1
KIT	1.16944e-66	4.87526	0.019	0	2.44121e-62
AC092145.1	1.35074e-09	4.87125	0.003	0	2.81968e-05
PARM1	7.53863e-242	4.86377	0.078	0.001	1.57369e-237

## Sheet: KDM6Bpos_HIF1Apos_mono_vs_other
gene	p_val	avg_log2FC	pct.1	pct.2	p_val_adj
SLC25A5	0	-1.22176	0.473	0.811	0
HSPA8	0	-1.27244	0.314	0.642	0
RGS19	0	-0.987346	0.392	0.72	0
ATP5PO	0	-0.862432	0.431	0.753	0
ATP5MC3	0	-0.900567	0.463	0.778	0
EIF3F	0	-0.918838	0.505	0.815	0
ATP5F1B	0	-1.0515	0.47	0.778	0
PPP1CA	0	-0.821985	0.493	0.792	0
TUBA1B	0	-1.1831	0.474	0.763	0
CD48	0	-0.875966	0.541	0.825	0
HLA-DPA1	0	-1.93443	0.553	0.82	0
EEF1B2	0	-1.09258	0.63	0.889	0
TPI1	0	-0.867426	0.637	0.888	0
ALDOA	0	-1.02028	0.658	0.903	0
RPS5	0	-1.22619	0.665	0.91	0
FKBP1A	0	-0.767042	0.602	0.847	0
HLA-DPB1	0	-1.41283	0.58	0.802	0
RPSA	0	-0.99816	0.693	0.904	0
PCBP1	0	-0.741298	0.682	0.893	0
EIF3K	0	-0.681901	0.692	0.902	0
PSME1	0	-0.747801	0.686	0.895	0
NME2	0	-0.724601	0.674	0.882	0
CTSZ	0	-0.715204	0.674	0.878	0
CHCHD2	0	-0.637847	0.709	0.908	0
MYL12A	0	-0.70958	0.695	0.89	0
ADAMTSL4-AS1	0	1.39429	0.666	0.475	0
PRELID1	0	-0.711601	0.716	0.905	0
HLA-DRB5	0	-1.14269	0.71	0.89	0
EEF1G	0	-0.665356	0.732	0.903	0
NPC2	0	-0.672257	0.77	0.926	0
ATP13A3	0	1.37966	0.747	0.593	0
CD68	0	-0.682492	0.764	0.918	0
BTF3	0	-0.760426	0.787	0.936	0
SLC2A3	0	0.96268	0.91	0.766	0
AC020916.1	0	1.19611	0.823	0.688	0
RPL10A	0	-0.876372	0.807	0.942	0
YBX1	0	-0.697327	0.829	0.954	0
VCAN	0	0.833614	0.987	0.863	0
SLC25A6	0	-0.822901	0.826	0.949	0
ARHGDIB	0	-0.750308	0.829	0.951	0
RPL5	0	-0.887613	0.832	0.952	0
PPIA	0	-0.648582	0.835	0.95	0
CSF3R	0	0.921979	0.951	0.837	0
EEF2	0	-0.679575	0.825	0.938	0
FNDC3B	0	1.04555	0.833	0.724	0
GSTP1	0	-0.641138	0.83	0.939	0
RPL23A	0	-0.684771	0.836	0.945	0
RPLP0	0	-0.870789	0.845	0.952	0
SERPINA1	0	-0.860629	0.841	0.945	0
FOXO3	0	1.07475	0.815	0.712	0
CORO1A	0	-0.669918	0.852	0.955	0
SPAG9	0	1.05506	0.786	0.683	0
ACSL1	0	1.16598	0.902	0.804	0
ARPC2	0	-0.521237	0.871	0.967	0
RPL3	0	-0.73322	0.855	0.951	0
RHOA	0	-0.59851	0.866	0.961	0
UBAP1	0	1.01086	0.809	0.721	0
ARPC1B	0	-0.760853	0.884	0.969	0
JARID2	0	1.27673	0.956	0.873	0
HLA-DRA	0	-1.10219	0.871	0.951	0
RPL21	0	-0.630347	0.882	0.957	0
RABGEF1	0	1.01422	0.915	0.847	0
TLR2	0	0.957672	0.808	0.741	0
FOSB	0	0.965032	0.9	0.834	0
RACK1	0	-0.797764	0.898	0.962	0
ARPC3	0	-0.659708	0.911	0.975	0
TOP1	0	0.955477	0.841	0.777	0
ARHGAP26	0	1.15409	0.987	0.924	0
RPL17	0	-0.599386	0.898	0.961	0
RPL15	0	-0.753419	0.9	0.961	0
SLCO3A1	0	0.877594	0.85	0.789	0
NACA	0	-0.828489	0.908	0.968	0
RBM47	0	0.893729	0.867	0.809	0
ZSWIM6	0	0.827869	0.843	0.788	0
TOM1	0	0.809306	0.861	0.806	0
SLC11A1	0	0.925109	0.894	0.84	0
PIK3R5	0	0.997448	0.869	0.815	0
RPS4X	0	-0.828474	0.912	0.963	0
PTPRE	0	0.906945	0.969	0.92	0
JMJD1C	0	0.960129	0.923	0.878	0
ATP2B1-AS1	0	0.805565	0.904	0.859	0
RPS25	0	-0.56107	0.922	0.967	0
GAB2	0	1.00804	0.96	0.916	0
TET2	0	0.814374	0.868	0.825	0
ZFAND3	0	0.897365	0.928	0.885	0
RPS3	0	-0.795333	0.924	0.967	0
ACTG1	0	-0.746089	0.926	0.969	0
GPCPD1	0	0.907538	0.919	0.877	0
HIF1A	0	0.966381	0.951	0.909	0
RPL7A	0	-0.752592	0.932	0.969	0
SIPA1L1	0	0.815234	0.88	0.844	0
SIK3	0	0.817544	0.911	0.877	0
RPS6	0	-0.606873	0.931	0.965	0
FCER1G	0	-0.666106	0.946	0.979	0
RPS27	0	-0.700195	0.945	0.976	0
RPL14	0	-0.60514	0.939	0.969	0
RPS3A	0	-0.702711	0.946	0.974	0
MED13L	0	0.703998	0.929	0.902	0
PLXDC2	0	0.854318	0.958	0.931	0
COTL1	0	-0.651454	0.969	0.993	0
RPL8	0	-0.734586	0.952	0.974	0
ATP2B1	0	1.03926	0.975	0.953	0
RPS27A	0	-0.592191	0.954	0.971	0
TYROBP	0	-0.333764	0.992	0.976	0
RPS18	0	-0.601694	0.955	0.97	0
MYO9B	0	0.749255	0.914	0.899	0
RPL18A	0	-0.711346	0.954	0.969	0
CST3	0	-0.553996	0.992	0.977	0
DPYD	0	0.795126	0.961	0.948	0
ELF1	0	0.691794	0.92	0.907	0
RPL28	0	-0.464386	0.991	0.978	0
RPL35A	0	-0.469381	0.955	0.967	0
RPL41	0	-0.414108	0.994	0.982	0
RPS2	0	-0.72803	0.965	0.977	0
PSAP	0	-0.549276	0.98	0.991	0
RPL29	0	-0.582365	0.958	0.968	0
NEAT1	0	0.788574	0.999	0.989	0
RPL6	0	-0.501977	0.96	0.97	0
FTL	0	-0.437873	0.999	0.989	0
TMSB4X	0	-0.466784	0.998	0.988	0
RPL10	0	-0.886355	0.978	0.987	0
NAMPT	0	0.963276	0.992	0.984	0
GAPDH	0	-0.601424	0.979	0.971	0
IFI30	0	-0.763149	0.987	0.995	0
RPS14	0	-0.433651	0.98	0.973	0
CFL1	0	-0.498936	0.969	0.976	0
USP15	0	0.678275	0.924	0.917	0
RPS7	0	-0.527031	0.963	0.969	0
HLA-C	0	-0.52647	0.986	0.992	0
RPL30	0	-0.644223	0.969	0.975	0
RPS15	0	-0.424632	0.98	0.974	0
RPS8	0	-0.530297	0.983	0.978	0
RPS13	0	-0.584275	0.967	0.972	0
RPS19	0	-0.634747	0.972	0.977	0
RPL32	0	-0.43337	0.979	0.975	0
RPS23	0	-0.517211	0.976	0.972	0
QKI	0	0.669234	0.937	0.933	0
PFN1	0	-0.630167	0.976	0.98	0
OAZ1	0	-0.518012	0.969	0.973	0
MT-ND2	0	0.583487	0.996	0.992	0
CD74	0	-0.879782	0.99	0.993	0
HLA-B	0	-0.469853	0.999	0.996	0
RPS12	0	-0.55598	0.978	0.975	0
RPL26	0	-0.595817	0.967	0.97	0
RPL19	0	-0.588203	0.977	0.974	0
RPL18	0	-0.457126	0.974	0.971	0
RPL11	0	-0.567215	0.978	0.976	0
ACTB	0	-0.736468	0.999	0.997	0
LRRFIP1	0	0.562509	0.984	0.985	0
EEF1A1	0	-0.960042	0.993	0.992	0
MALAT1	0	0.724734	1	0.999	0
B2M	0	-0.792077	0.998	0.997	0
RPS15A	0	-0.585066	0.973	0.972	0
MT-CO1	0	0.456534	1	0.999	0
MT-CO2	0	0.405027	1	0.999	0
MT-CO3	0	0.516268	1	0.999	0
MT-ND4	0	0.622266	0.996	0.995	0
MT-ND1	0	0.644638	0.997	0.997	0
ANPEP	5.19022e-308	1.24256	0.719	0.572	1.08346e-303
ZEB2	1.56449e-307	0.590413	0.97	0.974	3.26588e-303
MYL12B	5.31234e-298	-0.684079	0.625	0.866	1.10895e-293
PICALM	1.19677e-297	0.636314	0.927	0.922	2.49826e-293
CCNL1	6.33535e-297	0.710263	0.887	0.866	1.3225e-292
ANKRD11	7.35063e-297	0.793509	0.827	0.792	1.53444e-292
RHOC	9.49937e-296	-3.30163	0.06	0.305	1.98299e-291
NDUFA4	1.51361e-295	-0.772015	0.542	0.807	3.15966e-291
CD44	1.541e-295	0.684771	0.951	0.965	3.21684e-291
MCL1	4.90061e-295	0.58818	0.964	0.959	1.023e-290
CMIP	1.95598e-294	0.880409	0.791	0.723	4.08312e-290
KMT2C	3.3158e-294	0.677845	0.863	0.834	6.92174e-290
GABARAP	4.06496e-294	-0.381172	0.962	0.967	8.4856e-290
IQSEC1	2.01415e-292	0.897408	0.787	0.726	4.20455e-288
EIF3L	2.46598e-292	-0.942573	0.392	0.693	5.14774e-288
CLIC1	2.13469e-290	-0.505645	0.852	0.947	4.45617e-286
MYL6	3.08616e-290	-0.419071	0.955	0.97	6.44236e-286
UBA52	2.92726e-289	-0.37689	0.955	0.966	6.11064e-285
PLCB1	2.83631e-287	1.1324	0.75	0.61	5.9208e-283
PSMB8	6.35352e-287	-0.870424	0.408	0.717	1.3263e-282
PRDX1	2.51449e-286	-0.934407	0.361	0.673	5.249e-282
LY6E	6.23515e-286	-1.2265	0.334	0.623	1.30159e-281
SLC7A7	3.89926e-285	-0.933316	0.369	0.676	8.13971e-281
TNFAIP2	3.66675e-283	0.706093	0.894	0.855	7.65434e-279
RPL12	4.70225e-282	-0.390369	0.975	0.971	9.81595e-278
MT-CYB	5.54396e-281	0.430612	0.998	0.998	1.1573e-276
HNRNPA1	1.90127e-280	-0.629175	0.72	0.899	3.9689e-276
LRMDA	4.17653e-280	0.875417	0.833	0.791	8.71852e-276
PGAM1	5.13762e-279	-0.819434	0.458	0.75	1.07248e-274
MT-ND3	8.57407e-278	0.511203	0.993	0.993	1.78984e-273
PSMB9	1.10405e-277	-0.934847	0.427	0.722	2.30471e-273
SNHG29	4.31832e-276	-0.85332	0.472	0.755	9.01449e-272
ARIH1	2.25157e-275	0.828276	0.797	0.75	4.70015e-271
SUMO2	1.51628e-274	-0.66568	0.599	0.846	3.16524e-270
HLA-DRB1	4.42998e-274	-0.815528	0.878	0.957	9.24759e-270
COX5A	3.87519e-271	-0.710053	0.509	0.797	8.08946e-267
RPL4	7.09679e-271	-0.553175	0.807	0.928	1.48146e-266
FAU	1.41136e-270	-0.316872	0.987	0.975	2.9462e-266
RPL7	7.35078e-266	-0.496529	0.852	0.945	1.53447e-261
LDHA	7.39045e-265	-0.855842	0.367	0.674	1.54276e-260
AGFG1	7.56967e-264	0.930491	0.776	0.717	1.58017e-259
ETV6	2.0588e-262	0.73225	0.884	0.856	4.29774e-258
ATP5PB	2.09664e-262	-0.797167	0.408	0.714	4.37673e-258
TLE4	6.22736e-262	0.785591	0.813	0.775	1.29996e-257
RAC2	1.78325e-261	-0.717479	0.592	0.836	3.72253e-257
FCAR	3.012e-261	1.14296	0.647	0.487	6.28754e-257
RUNX1	1.02767e-260	1.03094	0.718	0.622	2.14527e-256
ATP5F1A	4.882e-260	-0.935133	0.324	0.627	1.01912e-255
CD37	3.16577e-259	-0.535086	0.816	0.94	6.60855e-255
YWHAB	4.66708e-258	-0.48853	0.81	0.94	9.74254e-254
SYNGR2	1.05893e-256	-0.843766	0.432	0.719	2.21051e-252
PSME2	1.40693e-256	-0.813809	0.583	0.821	2.93696e-252
RPL35	4.21797e-256	-0.455367	0.902	0.955	8.80501e-252
MDH2	5.42108e-256	-0.851813	0.32	0.632	1.13165e-251
RRAS	1.74811e-255	-1.49777	0.161	0.428	3.64919e-251
AIF1	1.25852e-253	-0.460566	0.969	0.972	2.62716e-249
USP3	2.67009e-251	0.620184	0.891	0.897	5.5738e-247
NUMB	7.60849e-251	0.790609	0.81	0.765	1.58827e-246
ROCK1	1.07007e-250	0.764109	0.817	0.787	2.23377e-246
PARK7	6.41051e-250	-0.733038	0.428	0.731	1.33819e-245
C9orf72	7.02784e-249	0.745979	0.869	0.842	1.46706e-244
GNB2	1.96888e-248	-0.580681	0.678	0.886	4.11004e-244
GNAI2	3.08953e-248	-0.432331	0.891	0.96	6.44939e-244
RPL27	1.66527e-244	-0.440424	0.876	0.948	3.47624e-240
RPL24	3.478e-243	-0.396247	0.926	0.963	7.26032e-239
FCGR3A	2.91231e-242	-4.81533	0.041	0.242	6.07944e-238
IVNS1ABP	5.58422e-242	1.11495	0.666	0.557	1.16571e-237
PSMA2	3.97078e-240	-0.887702	0.285	0.584	8.28901e-236
PLAUR	6.90032e-240	0.700936	0.943	0.926	1.44044e-235
RPS16	5.42913e-239	-0.40721	0.94	0.964	1.13333e-234
RBM3	3.13967e-238	-0.645575	0.603	0.834	6.55407e-234
RFX2	3.78611e-238	1.22238	0.606	0.457	7.9035e-234
PSMD8	2.74995e-237	-0.863484	0.272	0.572	5.74052e-233
IFITM3	3.92525e-237	-1.22646	0.6	0.804	8.19396e-233
CASP1	1.0965e-233	-0.816342	0.387	0.674	2.28894e-229
RBM39	6.61751e-233	0.529082	0.92	0.931	1.3814e-228
UBE2L6	4.02279e-232	-0.913936	0.282	0.57	8.39758e-228
LST1	4.41287e-231	-0.726625	0.928	0.973	9.21186e-227
ATP5F1C	1.06879e-230	-0.771859	0.367	0.666	2.23111e-226
NAAA	3.76909e-230	-0.867629	0.385	0.665	7.86798e-226
C20orf27	8.72502e-230	-0.881376	0.284	0.573	1.82135e-225
DENND5A	7.12017e-229	0.684202	0.828	0.805	1.48634e-224
MT-ATP6	2.17656e-227	0.432983	0.997	0.997	4.54357e-223
CFP	1.95818e-226	-0.631253	0.634	0.85	4.08769e-222
PGK1	1.25085e-224	-0.606832	0.668	0.867	2.61115e-220
COX4I1	1.88449e-224	-0.377803	0.924	0.966	3.93388e-220
AGTPBP1	2.05036e-224	0.771436	0.817	0.796	4.28012e-220
HSP90AB1	2.72986e-224	-0.711619	0.52	0.774	5.69859e-220
CALR	1.56119e-223	-0.925263	0.334	0.609	3.25898e-219
RGCC	3.31132e-223	1.06992	0.697	0.574	6.91237e-219
RPS9	1.30523e-222	-0.307304	0.986	0.981	2.72467e-218
RPS24	2.50016e-222	-0.298984	0.987	0.972	5.21909e-218
RNH1	6.60725e-222	-0.62972	0.566	0.812	1.37926e-217
PRKAG2	9.92532e-221	0.899921	0.736	0.681	2.07191e-216
STK10	1.04403e-220	0.636303	0.854	0.835	2.17941e-216
ABI3	5.31513e-220	-1.81667	0.091	0.311	1.10953e-215
MAP3K2	1.21718e-219	0.760563	0.795	0.781	2.54087e-215
HLA-DQA1	9.88683e-219	-1.60896	0.22	0.465	2.06388e-214
COX7A2	4.98969e-218	-0.586364	0.56	0.816	1.0416e-213
TUBB	6.69412e-218	-1.14817	0.2	0.459	1.3974e-213
SLC25A37	2.22348e-217	1.03185	0.667	0.557	4.64152e-213
RHOG	3.60137e-216	-0.567264	0.674	0.875	7.51785e-212
PTK2B	3.71482e-216	0.90762	0.733	0.678	7.75469e-212
CTSC	9.96481e-216	-1.04208	0.319	0.592	2.08015e-211
HIGD2A	2.54952e-215	-0.525392	0.708	0.886	5.32212e-211
CSNK1A1	6.56215e-215	0.696217	0.818	0.817	1.36985e-210
PHB2	1.37928e-214	-0.872583	0.262	0.542	2.87925e-210
GDI2	1.1687e-213	-0.719359	0.449	0.72	2.43967e-209
LGALS9	1.6492e-213	-0.698189	0.454	0.729	3.44272e-209
CYC1	1.68494e-213	-0.825962	0.263	0.55	3.51732e-209
AKAP13	2.59391e-213	0.621945	0.874	0.876	5.41479e-209
LRRC25	9.03824e-213	-0.985867	0.356	0.625	1.88673e-208
GNAS	1.20183e-212	-0.454817	0.8	0.931	2.50881e-208
RCOR1	1.41901e-212	0.861917	0.736	0.691	2.96218e-208
CIAO2A	2.61038e-212	-0.827056	0.264	0.553	5.44916e-208
UBB	3.62147e-212	-0.604734	0.573	0.813	7.55982e-208
CHD1	2.77101e-211	0.658058	0.823	0.808	5.78449e-207
UCP2	3.49319e-211	-0.720132	0.495	0.749	7.29204e-207
TREM1	1.20914e-210	0.911615	0.694	0.582	2.52408e-206
NDUFS7	4.01743e-210	-0.755711	0.328	0.62	8.38638e-206
BRK1	7.47516e-210	-0.61336	0.506	0.78	1.56044e-205
NPM1	3.45159e-209	-0.648151	0.525	0.779	7.20519e-205
DDOST	7.00136e-209	-0.928195	0.227	0.493	1.46153e-204
CTNNB1	1.09822e-208	0.714151	0.828	0.81	2.29254e-204
CSGALNACT2	4.31084e-208	0.730855	0.787	0.763	8.99887e-204
SNX17	6.6505e-207	-0.863842	0.237	0.512	1.38829e-202
RPL9	4.05243e-206	-0.370668	0.934	0.961	8.45945e-202
HMGN2	1.1754e-205	-0.558167	0.673	0.87	2.45365e-201
PGLS	2.10161e-205	-0.60096	0.544	0.804	4.38711e-201
CSF1R	8.9706e-205	-1.27557	0.242	0.49	1.87261e-200
STK17B	4.15821e-204	0.511474	0.96	0.971	8.68027e-200
MBP	4.59053e-204	0.692438	0.815	0.797	9.58274e-200
HLA-A	5.88899e-204	-0.370631	0.988	0.985	1.22933e-199
RTRAF	2.42754e-203	-0.757435	0.307	0.595	5.06749e-199
PNPLA8	2.95417e-203	0.953721	0.681	0.602	6.16683e-199
CALHM6	3.59856e-203	-0.9921	0.302	0.556	7.51199e-199
ANXA2	3.70678e-203	-0.467665	0.816	0.937	7.73789e-199
SAMSN1	7.21585e-203	0.813739	0.8	0.76	1.50631e-198
CSTB	1.01898e-202	-0.582331	0.641	0.855	2.12713e-198
MAP4K4	6.34602e-202	0.865662	0.746	0.696	1.32473e-197
SOD1	1.69226e-201	-1.03224	0.241	0.503	3.53259e-197
MT-ND5	5.4663e-201	0.445728	0.983	0.986	1.14109e-196
LAMTOR1	6.54638e-201	-0.600422	0.546	0.803	1.36656e-196
LILRA2	2.19277e-200	-0.748707	0.34	0.621	4.57741e-196
MGST3	2.24329e-200	-0.799414	0.288	0.565	4.68286e-196
CAT	2.44331e-200	-0.890265	0.231	0.496	5.1004e-196
ATXN1	1.35941e-199	1.01456	0.653	0.555	2.83777e-195
ACSL3	2.7831e-199	1.32338	0.587	0.47	5.80972e-195
PRDX3	2.0643e-198	-0.908517	0.207	0.469	4.30922e-194
RPL13	4.13126e-198	-0.3129	0.989	0.978	8.62401e-194
FAR1	6.46245e-198	0.869312	0.713	0.654	1.34904e-193
RPS4Y1	7.69403e-197	-0.768515	0.509	0.688	1.60613e-192
H2AFZ	7.8702e-197	-0.638756	0.479	0.745	1.6429e-192
ARL6IP5	1.07012e-196	-0.657397	0.484	0.742	2.23388e-192
RPL34	1.07046e-196	-0.267551	0.988	0.975	2.23458e-192
COX7A2L	9.5474e-196	-0.742006	0.33	0.609	1.99302e-191
RPS28	1.20425e-194	-0.282579	0.989	0.973	2.51388e-190
FXYD5	3.48452e-194	-0.408995	0.854	0.949	7.27393e-190
TOMM22	3.10806e-193	-0.822999	0.232	0.501	6.48807e-189
PSMB1	1.47175e-192	-0.593013	0.492	0.761	3.07228e-188
LMO2	2.70553e-192	-0.747368	0.373	0.641	5.6478e-188
DOCK4	4.07925e-192	1.39008	0.541	0.398	8.51544e-188
RAN	1.53442e-191	-0.690214	0.355	0.635	3.2031e-187
SEC11A	3.06774e-191	-0.594777	0.519	0.777	6.40391e-187
SUPT4H1	1.18194e-190	-0.681156	0.381	0.659	2.4673e-186
TMEM59	1.90918e-189	-0.648276	0.379	0.658	3.98541e-185
AQP9	5.36144e-189	1.13367	0.545	0.395	1.1192e-184
PFDN5	1.11565e-188	-0.307862	0.957	0.973	2.32892e-184
SPCS1	1.35817e-188	-0.650346	0.385	0.668	2.83517e-184
ATP5MC2	2.16114e-188	-0.355956	0.918	0.956	4.51138e-184
SSR2	2.4856e-188	-0.612521	0.457	0.729	5.1887e-184
CAP1	5.28668e-188	-0.555489	0.628	0.844	1.1036e-183
PSMB10	1.39286e-187	-0.588135	0.56	0.801	2.90761e-183
CHST11	3.38547e-187	0.787554	0.767	0.74	7.06717e-183
SDC2	1.32382e-186	1.7174	0.372	0.207	2.76347e-182
FTH1	1.90675e-186	-0.326859	1	0.998	3.98034e-182
GPBAR1	2.26992e-186	-1.23948	0.129	0.349	4.73846e-182
CAMK1	3.84338e-186	-1.02544	0.164	0.398	8.02306e-182
COX7C	2.26035e-185	-0.394944	0.827	0.932	4.71849e-181
APRT	1.02038e-184	-0.56891	0.505	0.764	2.13004e-180
COX5B	2.45405e-184	-0.420889	0.764	0.917	5.12282e-180
NDUFA12	3.11038e-184	-0.686514	0.323	0.599	6.49293e-180
CAPNS1	4.76413e-184	-0.530182	0.613	0.833	9.94513e-180
EIF3E	6.42565e-184	-0.628628	0.448	0.711	1.34135e-179
CNBP	9.93256e-184	-0.506696	0.623	0.847	2.07342e-179
C1QBP	2.48931e-183	-0.929385	0.181	0.422	5.19644e-179
CCNI	1.86727e-182	-0.487893	0.705	0.886	3.89793e-178
PPIB	2.27338e-182	-0.526909	0.66	0.861	4.74569e-178
CDK2AP1	2.41006e-182	-1.19601	0.138	0.358	5.031e-178
CORO1B	2.42531e-182	-0.915751	0.215	0.462	5.06284e-178
SSR3	8.70302e-182	-0.717145	0.304	0.575	1.81676e-177
BST2	1.1524e-181	-0.637413	0.426	0.696	2.40563e-177
TKT	1.36315e-181	-0.423557	0.893	0.954	2.84557e-177
HADHA	1.58626e-181	-0.627855	0.439	0.709	3.31132e-177
IFITM2	1.95865e-181	-0.833354	0.809	0.93	4.08868e-177
LDHB	6.10701e-181	-0.972407	0.208	0.449	1.27484e-176
FNIP1	6.33808e-181	0.804552	0.701	0.651	1.32307e-176
RPL36A	7.07528e-181	-0.362606	0.927	0.96	1.47697e-176
LIMD2	2.02729e-180	-0.461514	0.753	0.911	4.23197e-176
FIBP	1.68826e-179	-0.954839	0.158	0.391	3.52424e-175
IDH2	3.7806e-179	-0.961375	0.161	0.394	7.89201e-175
DMXL2	1.50008e-178	0.740482	0.784	0.748	3.13142e-174
SKP1	2.31877e-178	-0.533017	0.528	0.784	4.84042e-174
CYBA	6.4949e-178	-0.264538	0.985	0.985	1.35581e-173
SRP14	6.51563e-178	-0.431203	0.731	0.899	1.36014e-173
VPS29	1.7878e-177	-0.674486	0.342	0.617	3.73202e-173
AFF4	1.80172e-176	0.703623	0.769	0.753	3.7611e-172
CDKN1C	2.43077e-176	-4.27692	0.051	0.214	5.07424e-172
ASAP1	1.83e-175	0.659889	0.819	0.811	3.82012e-171
ATG3	2.23429e-175	-0.648193	0.399	0.666	4.66408e-171
SRI	2.91225e-175	-0.788336	0.222	0.475	6.07933e-171
ANTXR2	1.04628e-174	1.03084	0.619	0.532	2.18411e-170
ATP6V0C	2.40051e-174	-0.379342	0.869	0.945	5.01106e-170
TPM4	6.35133e-174	0.725817	0.798	0.77	1.32584e-169
ATRAID	1.01908e-173	-0.788515	0.211	0.461	2.12732e-169
DCTN3	5.96752e-173	-0.714032	0.268	0.532	1.24572e-168
PPP1CC	7.46696e-173	-0.769819	0.249	0.504	1.55873e-168
PPDPF	7.65351e-173	-0.513354	0.723	0.892	1.59767e-168
NDUFB5	7.8496e-173	-0.877819	0.189	0.428	1.6386e-168
LINC01619	1.30056e-172	0.785526	0.699	0.633	2.71492e-168
TRPS1	1.46798e-172	1.03597	0.64	0.555	3.0644e-168
OSTC	5.27789e-172	-0.869939	0.192	0.432	1.10176e-167
WDR83OS	6.36451e-172	-0.495726	0.559	0.809	1.32859e-167
OSTF1	8.11186e-172	-0.61893	0.369	0.641	1.69335e-167
PSMB6	1.19136e-171	-0.601037	0.411	0.686	2.48697e-167
LUCAT1	2.36999e-171	1.49433	0.424	0.268	4.94735e-167
FNDC3A	4.50404e-171	1.02788	0.621	0.539	9.40219e-167
CD300A	4.77698e-171	-0.885087	0.179	0.41	9.97195e-167
MS4A7	5.67953e-171	-1.24955	0.349	0.572	1.1856e-166
IL1RAP	1.65e-170	1.36617	0.471	0.33	3.44438e-166
MTRNR2L12	1.93871e-170	0.459515	0.992	0.994	4.04705e-166
ICAM2	3.53591e-170	-1.15215	0.125	0.334	7.38121e-166
DYNLL1	5.08411e-170	-0.715726	0.307	0.566	1.06131e-165
NAP1L1	7.18059e-170	-0.784311	0.541	0.759	1.49895e-165
TMEM179B	8.369e-170	-0.719203	0.251	0.506	1.74703e-165
SMDT1	1.10307e-169	-0.585876	0.418	0.692	2.30266e-165
GLIPR1	1.47939e-169	-0.578992	0.522	0.768	3.08822e-165
OAS1	1.57669e-168	-1.172	0.148	0.359	3.29135e-164
GET3	2.0581e-168	-0.923748	0.148	0.371	4.29629e-164
HINT1	7.13383e-168	-0.536055	0.602	0.827	1.48919e-163
ZYX	7.53406e-168	-0.407658	0.803	0.923	1.57274e-163
NHP2	1.174e-167	-0.826854	0.186	0.422	2.45072e-163
CLEC7A	1.23184e-167	0.49767	0.914	0.919	2.57147e-163
RPL36AL	1.42175e-167	-0.383674	0.803	0.933	2.9679e-163
CALM2	1.64753e-167	-0.466843	0.785	0.912	3.43922e-163
CCT6A	1.9219e-167	-0.729186	0.253	0.508	4.01196e-163
VSIR	4.82638e-167	-0.454584	0.796	0.928	1.00751e-162
RAB32	4.8293e-167	-0.595506	0.383	0.659	1.00812e-162
PDIA6	5.29365e-167	-0.72514	0.235	0.485	1.10505e-162
KDM2A	1.02035e-166	0.673796	0.771	0.752	2.12998e-162
NLRP3	1.59434e-166	0.802491	0.713	0.661	3.32818e-162
LILRB1	3.11831e-166	-0.923375	0.348	0.588	6.50948e-162
TAF10	3.67604e-166	-0.47502	0.644	0.859	7.67373e-162
SPN	4.228e-166	-1.26472	0.16	0.37	8.82595e-162
MYO1F	4.27159e-166	0.497138	0.909	0.924	8.91694e-162
TBCB	4.44086e-166	-0.69368	0.299	0.559	9.2703e-162
CSF2RA	8.64631e-166	0.874031	0.683	0.629	1.80492e-161
COX6A1	1.33388e-165	-0.403171	0.76	0.911	2.78448e-161
GPSM3	5.18399e-165	-0.449245	0.703	0.885	1.08216e-160
CSNK2B	5.76366e-165	-0.499365	0.553	0.807	1.20316e-160
NDUFAB1	2.15512e-164	-0.665379	0.268	0.529	4.49881e-160
DOK2	2.87353e-164	-0.718897	0.332	0.583	5.9985e-160
APH1A	4.3772e-164	-0.705583	0.252	0.504	9.1374e-160
SLC25A3	6.73631e-164	-0.513603	0.599	0.816	1.40621e-159
C4orf3	1.01456e-163	-0.524172	0.445	0.717	2.1179e-159
SNRPC	1.85699e-163	-0.668195	0.268	0.527	3.87647e-159
POLR2G	4.54472e-163	-0.729131	0.216	0.464	9.4871e-159
CCT7	1.20787e-162	-0.994525	0.123	0.329	2.52144e-158
UQCR10	1.30094e-162	-0.474773	0.558	0.812	2.71571e-158
MDH1	3.82943e-162	-0.948312	0.136	0.349	7.99393e-158
ARPC4	3.88787e-162	-0.533763	0.507	0.758	8.11593e-158
MRPS35	8.59871e-162	-1.12081	0.127	0.331	1.79498e-157
TCF25	1.25897e-161	0.566461	0.852	0.865	2.62809e-157
DAD1	2.17295e-161	-0.602331	0.333	0.604	4.53603e-157
SDHD	2.72597e-161	-0.775752	0.204	0.44	5.69047e-157
FCGRT	2.78085e-161	-0.457225	0.708	0.884	5.80503e-157
FIS1	4.44382e-161	-0.616105	0.325	0.595	9.27647e-157
PSMA4	1.82106e-160	-0.721446	0.273	0.523	3.80146e-156
GPI	3.41277e-160	-0.711037	0.283	0.533	7.12416e-156
PSMB2	2.17271e-159	-0.671595	0.242	0.491	4.53554e-155
FAM49B	3.25114e-159	0.504953	0.871	0.892	6.78676e-155
HLA-DQA2	3.29842e-159	-1.71212	0.152	0.334	6.88546e-155
RBPJ	4.38234e-159	0.749791	0.709	0.679	9.14814e-155
NFAT5	5.30954e-159	0.756875	0.725	0.674	1.10837e-154
MAML3	1.018e-158	0.873301	0.667	0.606	2.12507e-154
COPZ1	1.07567e-158	-0.892604	0.146	0.36	2.24547e-154
DRAP1	1.63264e-158	-0.625968	0.53	0.765	3.40813e-154
GAS7	1.83268e-158	0.655409	0.784	0.764	3.82572e-154
PYCARD	2.11189e-158	-0.421686	0.769	0.91	4.40856e-154
ATP11B	3.02596e-158	0.791709	0.699	0.661	6.31669e-154
DBI	1.03015e-157	-0.526829	0.528	0.778	2.15043e-153
CEBPA	1.05286e-157	-0.901882	0.16	0.378	2.19784e-153
ITGA4	2.51971e-157	-0.699783	0.438	0.678	5.2599e-153
SH3BGRL	3.02527e-157	-0.454507	0.686	0.872	6.31525e-153
AHR	7.36915e-157	0.839264	0.741	0.695	1.53831e-152
SH3BGRL3	1.10907e-156	-0.246124	0.992	0.975	2.31518e-152
UQCRC1	2.54086e-156	-0.575939	0.378	0.64	5.30404e-152
NDUFB3	2.95213e-156	-0.698802	0.24	0.484	6.16257e-152
C1orf162	2.95798e-156	-0.482224	0.678	0.862	6.17477e-152
CTSH	6.19197e-156	-0.530001	0.55	0.78	1.29257e-151
PSMA5	1.21688e-155	-0.703229	0.24	0.485	2.54025e-151
SMAD3	1.45015e-155	0.866851	0.636	0.556	3.02718e-151
NDUFA6	2.07658e-155	-0.583304	0.357	0.619	4.33485e-151
FBXW7	2.51681e-155	0.588053	0.778	0.773	5.25385e-151
LSM4	7.75482e-155	-0.67564	0.232	0.475	1.61882e-150
ATG7	8.65273e-155	0.822106	0.692	0.654	1.80626e-150
DENND1A	1.77361e-154	0.676669	0.746	0.732	3.70241e-150
DOCK5	2.22567e-154	0.61747	0.722	0.683	4.64608e-150
RRP12	2.69026e-154	0.853331	0.691	0.637	5.61591e-150
GLRX	6.80831e-154	-0.622122	0.405	0.657	1.42123e-149
CD33	1.16988e-153	-0.735347	0.231	0.467	2.44212e-149
UQCRB	1.1978e-153	-0.416779	0.741	0.894	2.50042e-149
OXA1L	1.22775e-153	-0.616731	0.322	0.576	2.56293e-149
GSTK1	1.25868e-153	-0.466706	0.638	0.843	2.6275e-149
TMEM230	1.82279e-153	-0.809517	0.18	0.404	3.80508e-149
ATP9B	1.92023e-153	0.89041	0.615	0.539	4.00848e-149
AP1S2	2.03727e-153	-0.495134	0.69	0.867	4.25281e-149
PSMC5	2.23339e-153	-0.739634	0.196	0.425	4.6622e-149
CSK	3.25058e-153	-0.595288	0.488	0.721	6.78558e-149
CCT8	4.24562e-153	-0.713966	0.22	0.454	8.86274e-149
POLD4	7.02597e-152	-0.617004	0.412	0.666	1.46667e-147
TUFM	1.49078e-151	-0.631103	0.315	0.568	3.112e-147
PHB	1.75042e-151	-1.02786	0.101	0.291	3.654e-147
RPL13A	2.79384e-151	-0.333398	0.93	0.962	5.83214e-147
ARF5	2.96412e-151	-0.478775	0.586	0.813	6.18759e-147
BACH1	4.09598e-151	0.545053	0.84	0.845	8.55035e-147
UQCRFS1	4.70927e-151	-0.543871	0.406	0.668	9.8306e-147
ATP5MG	5.83595e-151	-0.325889	0.874	0.946	1.21826e-146
MYDGF	1.48765e-149	-0.642127	0.285	0.536	3.10547e-145
DENND4A	2.46524e-149	0.925847	0.611	0.529	5.14619e-145
BRAF	7.2746e-149	0.886979	0.617	0.54	1.51857e-144
KDELR1	3.15078e-148	-0.576899	0.358	0.619	6.57725e-144
UFC1	8.61289e-148	-0.607781	0.324	0.576	1.79794e-143
CD47	1.325e-147	-0.784327	0.246	0.475	2.76595e-143
ERGIC3	1.37549e-147	-0.631365	0.278	0.525	2.87133e-143
NAPSA	2.62903e-147	-1.5151	0.08	0.249	5.48809e-143
PEBP1	3.66752e-147	-1.02179	0.122	0.314	7.65595e-143
RNF149	5.8187e-147	0.619541	0.839	0.852	1.21465e-142
PILRA	5.99365e-147	-0.514546	0.608	0.818	1.25117e-142
PTPN12	8.95059e-147	0.818792	0.687	0.651	1.86844e-142
ERP29	1.11616e-146	-0.491363	0.574	0.803	2.32999e-142
SPIDR	1.17309e-146	0.746383	0.721	0.694	2.44883e-142
NDUFAF3	1.48592e-146	-0.687548	0.204	0.434	3.10185e-142
EEF1D	2.41072e-146	-0.338472	0.857	0.944	5.03237e-142
CCT3	3.69638e-146	-0.915966	0.119	0.313	7.71618e-142
KDM6B	5.90477e-146	0.838489	0.65	0.591	1.23262e-141
UBAC2	8.62117e-146	0.804331	0.663	0.619	1.79967e-141
TWF2	1.05922e-145	-0.58235	0.364	0.622	2.21111e-141
ARL6IP4	1.85086e-145	-0.473929	0.562	0.792	3.86366e-141
POLR2E	1.94969e-145	-0.571601	0.342	0.601	4.06999e-141
EIF3G	4.64426e-145	-0.478084	0.523	0.774	9.69489e-141
LILRA1	1.00219e-144	-0.730308	0.259	0.49	2.09206e-140
SLA	1.19917e-144	1.14662	0.528	0.426	2.50326e-140
CFD	1.38467e-144	-0.531578	0.746	0.883	2.89051e-140
SDHC	1.73951e-144	-0.688915	0.209	0.436	3.63123e-140
S100A8	2.13026e-144	0.288204	0.998	0.911	4.44691e-140
SDHB	6.52289e-144	-0.627477	0.244	0.484	1.36165e-139
APEX1	8.92782e-144	-0.844745	0.162	0.369	1.86368e-139
GRN	1.12902e-143	-0.423348	0.818	0.917	2.35683e-139
SRP9	3.62411e-143	-0.645852	0.253	0.491	7.56533e-139
RPS21	4.00376e-143	-0.278435	0.963	0.966	8.35785e-139
SNX3	7.12616e-143	-0.46719	0.579	0.808	1.48759e-138
ECH1	8.38405e-143	-0.595057	0.268	0.515	1.75017e-138
ABRACL	1.7058e-142	-0.563283	0.375	0.625	3.56086e-138
CCND3	1.75508e-142	-0.613051	0.321	0.562	3.66373e-138
ATP6V1G1	1.81837e-142	-0.430248	0.618	0.835	3.79585e-138
ELOVL1	1.94807e-142	-0.907255	0.144	0.342	4.06661e-138
MSN	2.39214e-142	-0.429839	0.706	0.886	4.9936e-138
TMEM14C	5.31011e-142	-0.709495	0.205	0.425	1.10849e-137
GHITM	6.37837e-142	-0.560323	0.341	0.59	1.33149e-137
FOSL2	9.42439e-142	0.756325	0.704	0.674	1.96734e-137
SMCHD1	9.68198e-142	0.595384	0.805	0.811	2.02111e-137
PGS1	9.2845e-141	1.00332	0.543	0.446	1.93814e-136
DIAPH2	9.37272e-141	0.635581	0.757	0.753	1.95656e-136
SF3B5	2.69643e-140	-0.492906	0.447	0.716	5.62879e-136
COX6C	6.15124e-140	-0.436184	0.631	0.831	1.28407e-135
SF3B6	7.1801e-140	-0.587525	0.275	0.52	1.49885e-135
PELI1	8.36258e-140	0.941682	0.663	0.596	1.74569e-135
FOXP1	1.54943e-139	0.500584	0.807	0.817	3.23444e-135
ILK	9.29248e-139	-0.728805	0.177	0.391	1.93981e-134
NUTF2	1.30444e-138	-0.682401	0.2	0.421	2.72302e-134
EIF4A1	1.44752e-138	-0.316407	0.87	0.955	3.02169e-134
HLA-DMA	2.37077e-138	-0.646493	0.548	0.737	4.94899e-134
PDLIM2	3.232e-138	-0.702429	0.193	0.41	6.7468e-134
UQCRC2	4.22565e-138	-0.612879	0.243	0.476	8.82105e-134
S100A4	5.51169e-138	-0.220134	0.995	0.974	1.15057e-133
SIGLEC10	5.56365e-138	-1.24243	0.134	0.314	1.16141e-133
MRPS24	8.67271e-138	-0.598571	0.269	0.51	1.81043e-133
AKR7A2	9.1656e-138	-1.10871	0.089	0.26	1.91332e-133
CUX1	1.9525e-137	0.546365	0.82	0.818	4.07585e-133
SYK	1.97258e-137	0.499684	0.862	0.886	4.11775e-133
TMBIM4	2.25066e-137	-0.484071	0.457	0.706	4.69824e-133
PTGES3	3.23557e-137	-0.56742	0.501	0.731	6.75426e-133
ERH	4.16018e-137	-0.508295	0.363	0.622	8.68438e-133
EIF4G3	4.69122e-137	0.946777	0.583	0.504	9.79292e-133
RPL27A	6.90125e-137	-0.369764	0.816	0.92	1.44064e-132
CXCL8	6.99799e-137	0.885064	0.575	0.431	1.46083e-132
MAML2	7.27126e-137	1.03228	0.581	0.491	1.51788e-132
LILRA5	1.02247e-136	-0.615567	0.498	0.712	2.13441e-132
SSNA1	1.17226e-136	-0.615874	0.265	0.504	2.44709e-132
WDFY3	1.85117e-136	0.92262	0.587	0.508	3.86433e-132
AHCY	1.65949e-135	-1.29353	0.062	0.217	3.46419e-131
SRM	2.01284e-135	-0.908011	0.13	0.318	4.20181e-131
DOCK2	2.23939e-135	0.424463	0.844	0.858	4.67472e-131
CPVL	2.24801e-135	-0.548102	0.604	0.791	4.69271e-131
BCAP31	3.16622e-135	-0.560845	0.357	0.605	6.60949e-131
LIPA	3.51288e-135	-0.910463	0.165	0.361	7.33313e-131
UQCRH	1.48912e-134	-0.423819	0.64	0.848	3.10855e-130
CALM1	1.81515e-134	-0.396627	0.765	0.909	3.78913e-130
PCNX1	2.46933e-134	1.05438	0.546	0.456	5.15473e-130
PLAC8	3.26989e-134	-0.800556	0.31	0.527	6.8259e-130
MAP2K2	3.39616e-134	-0.539979	0.34	0.59	7.08948e-130
TADA3	4.46962e-134	-0.855315	0.136	0.326	9.33034e-130
DHX34	5.22638e-134	1.06975	0.511	0.408	1.09101e-129
ALKBH7	5.62976e-134	-0.57465	0.34	0.585	1.17521e-129
AHCTF1	6.37508e-134	0.939948	0.55	0.457	1.3308e-129
PPARG	8.08955e-134	1.70305	0.308	0.177	1.68869e-129
RPL23	1.08562e-133	-0.36278	0.795	0.918	2.26624e-129
CTDNEP1	1.84241e-133	-0.512531	0.398	0.653	3.84603e-129
DYRK1A	3.56307e-133	0.761152	0.641	0.593	7.4379e-129
BIRC6	6.59883e-133	0.644699	0.718	0.7	1.37751e-128
ARPC5	8.12788e-133	-0.358993	0.788	0.914	1.6967e-128
HPCAL1	9.79453e-133	1.02289	0.647	0.623	2.04461e-128
RPL22	1.96779e-132	-0.285565	0.942	0.96	4.10776e-128
COP1	2.73551e-132	0.612927	0.733	0.732	5.71038e-128
AP2M1	4.21597e-132	-0.513977	0.366	0.616	8.80083e-128
CHSY1	4.84778e-132	1.07954	0.526	0.436	1.01197e-127
NDUFB2	5.98535e-132	-0.432888	0.564	0.799	1.24944e-127
EIF5A	7.49334e-132	-0.462538	0.577	0.795	1.56424e-127
HNRNPDL	1.43816e-131	-0.413484	0.671	0.859	3.00215e-127
EVL	2.32646e-131	-1.16425	0.114	0.284	4.85649e-127
PSMD4	3.11994e-131	-0.5446	0.299	0.54	6.51287e-127
MT-ND4L	3.2973e-131	0.345786	0.98	0.983	6.88311e-127
ARF6	3.59179e-131	-0.466685	0.538	0.765	7.49786e-127
SCP2	4.38176e-131	-0.58789	0.258	0.49	9.14693e-127
PIN1	4.63582e-131	-0.609383	0.204	0.424	9.67728e-127
IGF2R	9.44952e-131	0.843321	0.628	0.561	1.97259e-126
LTA4H	9.93591e-131	-0.513984	0.596	0.8	2.07412e-126
ATP5PF	1.12283e-130	-0.457726	0.464	0.715	2.34392e-126
CRTAP	1.19956e-130	-0.582527	0.422	0.648	2.50409e-126
VDAC1	3.68378e-130	-0.569674	0.319	0.557	7.6899e-126
FBXO11	4.08421e-130	0.733667	0.672	0.629	8.5258e-126
MRPL43	5.04394e-130	-0.711184	0.171	0.375	1.05292e-125
S100A11	6.15948e-130	-0.255374	0.985	0.981	1.28579e-125
VAV3	6.39813e-130	1.04083	0.569	0.495	1.33561e-125
LMAN2	7.14951e-130	-0.549574	0.271	0.507	1.49246e-125
SNX10	2.29902e-129	-0.50563	0.425	0.673	4.7992e-125
TRAPPC1	5.37594e-129	-0.453991	0.506	0.747	1.12223e-124
CHCHD10	5.44615e-129	-0.501065	0.452	0.691	1.13688e-124
VMP1	5.4996e-129	0.636266	0.773	0.771	1.14804e-124
VPS28	1.21695e-128	-0.487122	0.44	0.689	2.54038e-124
HSPE1	1.50678e-128	-0.740767	0.156	0.349	3.14541e-124
NDUFB10	1.78566e-128	-0.459465	0.436	0.687	3.72757e-124
KMT2E	1.91753e-128	0.619841	0.759	0.767	4.00285e-124
PRDX5	2.01879e-128	-0.452271	0.486	0.734	4.21422e-124
CDK2AP2	2.84309e-128	-0.712764	0.174	0.374	5.93495e-124
IFITM1	2.85667e-128	-1.64268	0.108	0.267	5.96329e-124
TLE3	3.37536e-128	0.860118	0.625	0.564	7.04607e-124
ICAM3	4.4166e-128	-0.539481	0.424	0.657	9.21965e-124
PLD4	7.5733e-128	-2.87391	0.016	0.13	1.58093e-123
GPX4	7.67307e-128	-0.401161	0.685	0.87	1.60175e-123
GNAQ	1.24031e-127	0.631443	0.739	0.731	2.58914e-123
SELENOH	1.33535e-127	-0.429729	0.522	0.763	2.78755e-123
CD81	2.1408e-127	-0.803665	0.174	0.366	4.46893e-123
TXNL4A	2.741e-127	-0.481763	0.393	0.645	5.72184e-123
NDUFS8	6.41698e-127	-0.585747	0.269	0.497	1.33954e-122
TMED9	7.23886e-127	-0.600814	0.234	0.453	1.51111e-122
CD55	9.34605e-127	0.499171	0.859	0.87	1.95099e-122
KXD1	1.06292e-126	-0.674139	0.184	0.389	2.21884e-122
AOAH	1.12023e-126	0.50278	0.87	0.897	2.33847e-122
SSR4	2.65374e-126	-0.410066	0.608	0.821	5.53969e-122
AP003086.1	8.05798e-126	0.892064	0.591	0.527	1.6821e-121
SPINT2	1.25747e-125	-0.706023	0.202	0.407	2.62497e-121
AC007952.4	1.84744e-125	0.934847	0.616	0.536	3.85653e-121
MRPL51	2.09909e-125	-0.628847	0.195	0.406	4.38185e-121
HSP90AA1	4.14721e-125	-0.408488	0.639	0.832	8.65731e-121
RANBP1	1.00976e-124	-0.702061	0.153	0.346	2.10788e-120
IFI35	1.46093e-124	-0.661365	0.185	0.386	3.04969e-120
ZNF706	1.59584e-124	-0.556559	0.314	0.546	3.33131e-120
PKN1	1.8677e-124	-0.601874	0.349	0.58	3.89881e-120
KDELR2	2.35773e-124	-0.59029	0.22	0.437	4.92177e-120
PSMA7	2.48218e-124	-0.401978	0.634	0.839	5.18156e-120
BIN2	4.13349e-124	-0.526781	0.416	0.649	8.62867e-120
DYSF	5.2897e-124	1.04766	0.485	0.362	1.10422e-119
PFKFB3	6.16858e-124	0.787886	0.661	0.614	1.28769e-119
CREB5	1.4646e-123	0.989296	0.565	0.476	3.05734e-119
LAMTOR2	1.94443e-123	-0.503539	0.357	0.6	4.05899e-119
B4GALT1	3.38153e-123	0.715438	0.672	0.642	7.05894e-119
PTP4A2	4.80013e-123	-0.412679	0.755	0.9	1.00203e-118
PPP1R7	5.96113e-123	-0.641173	0.189	0.395	1.24439e-118
RGS2	8.14741e-123	0.495009	0.866	0.851	1.70077e-118
NDUFB4	8.75313e-123	-0.474328	0.411	0.659	1.82722e-118
IDH3G	8.86466e-123	-0.580135	0.249	0.473	1.8505e-118
LSM3	1.46817e-122	-0.601198	0.211	0.425	3.0648e-118
UBL7	1.70276e-122	-0.846316	0.112	0.285	3.55451e-118
SLC66A3	5.19532e-122	-0.696746	0.168	0.362	1.08452e-117
RPS11	6.77673e-122	-0.307459	0.903	0.95	1.41464e-117
TOMM6	7.41378e-122	-0.417505	0.546	0.778	1.54763e-117
CCDC115	8.29372e-122	-1.02836	0.085	0.241	1.73131e-117
LGALS1	1.12325e-121	-0.325743	0.924	0.956	2.34479e-117
RPS26	1.26717e-121	-0.376584	0.946	0.964	2.64523e-117
EMC7	2.7711e-121	-0.655165	0.155	0.345	5.78467e-117
CREBBP	2.86227e-121	0.714544	0.656	0.628	5.97499e-117
IRF5	3.14928e-121	-0.722802	0.163	0.353	6.57412e-117
HES4	3.22208e-121	-2.22212	0.042	0.167	6.72609e-117
SH3BP5	6.92512e-121	0.939635	0.564	0.488	1.44562e-116
FGL2	7.7934e-121	-0.41785	0.646	0.833	1.62687e-116
CD300C	8.08552e-121	-0.652755	0.201	0.403	1.68785e-116
PDCD2	8.22764e-121	-0.802936	0.126	0.302	1.71752e-116
RAPGEF1	1.37755e-120	0.608041	0.723	0.715	2.87564e-116
MEA1	1.38899e-120	-0.662677	0.158	0.349	2.89951e-116
MRPL11	1.64215e-120	-0.711757	0.142	0.325	3.428e-116
BATF3	2.05676e-120	-1.91488	0.033	0.155	4.2935e-116
RNASET2	3.26449e-120	-0.407372	0.757	0.898	6.81462e-116
SECTM1	3.90249e-120	-0.617235	0.285	0.499	8.14645e-116
VAMP8	4.54478e-120	-0.414859	0.651	0.836	9.48724e-116
TPT1	4.56668e-120	-0.209054	0.994	0.983	9.53294e-116
RPL36	4.88125e-120	-0.252883	0.962	0.965	1.01896e-115
SRSF9	5.04948e-120	-0.399533	0.555	0.788	1.05408e-115
RER1	5.51543e-120	-0.510649	0.271	0.498	1.15135e-115
ELL2	6.81661e-120	1.03794	0.516	0.423	1.42297e-115
HSBP1	7.78376e-120	-0.450658	0.433	0.672	1.62486e-115
PSMD9	8.24749e-120	-0.581215	0.214	0.422	1.72166e-115
CD79B	1.03289e-119	-3.24453	0.012	0.117	2.15617e-115
SH3KBP1	1.25593e-119	0.537021	0.798	0.826	2.62175e-115
NEURL1	1.44092e-119	-2.29997	0.025	0.141	3.00793e-115
LY86	1.57903e-119	-0.525886	0.43	0.65	3.29622e-115
PYURF	2.01628e-119	-0.523294	0.247	0.468	4.20898e-115
DOCK8	2.16292e-119	0.44021	0.869	0.894	4.51509e-115
HMOX1	2.19337e-119	-0.316491	0.386	0.608	4.57867e-115
CYTH1	2.20496e-119	0.549417	0.732	0.731	4.60285e-115
M6PR	2.235e-119	-0.492279	0.388	0.623	4.66556e-115
GLRX5	2.47902e-119	-0.733369	0.134	0.314	5.17495e-115
RPS17	2.49385e-119	-0.389227	0.69	0.865	5.20591e-115
RANBP2	3.46023e-119	0.831372	0.623	0.568	7.22322e-115
NDUFB8	3.73241e-119	-0.428672	0.463	0.716	7.79141e-115
HSD17B10	4.73074e-119	-0.636164	0.185	0.384	9.87543e-115
PLAAT4	2.3002e-118	-0.670626	0.229	0.435	4.80167e-114
YIF1A	2.76805e-118	-0.988357	0.085	0.239	5.77829e-114
JTB	3.69259e-118	-0.424415	0.466	0.716	7.70829e-114
HSP90B1	4.16256e-118	-0.462703	0.455	0.684	8.68934e-114
CBR1	5.60578e-118	-0.857808	0.124	0.295	1.17021e-113
COMMD6	8.22757e-118	-0.370348	0.675	0.863	1.71751e-113
SNRPD2	9.57439e-118	-0.415018	0.554	0.785	1.99865e-113
HEBP1	9.84544e-118	-0.669962	0.18	0.373	2.05524e-113
HLA-DQB1	1.42676e-117	-0.701138	0.577	0.75	2.97835e-113
RAB11FIP1	2.36341e-117	0.675785	0.749	0.746	4.93361e-113
FBL	2.45813e-117	-0.648272	0.208	0.411	5.13136e-113
DNPH1	5.84364e-117	-0.945774	0.091	0.247	1.21986e-112
DCXR	7.25665e-117	-0.610451	0.186	0.384	1.51483e-112
NDUFA13	7.27895e-117	-0.352299	0.685	0.875	1.51948e-112
EMILIN2	8.77209e-117	0.438605	0.85	0.871	1.83117e-112
ARL5A	9.82281e-117	-0.593311	0.205	0.407	2.05051e-112
COMMD7	1.4305e-116	-0.592086	0.186	0.385	2.98617e-112
RASGEF1B	1.85023e-116	0.480025	0.77	0.764	3.86235e-112
SLC25A11	1.95235e-116	-0.793172	0.133	0.307	4.07552e-112
DOT1L	2.5087e-116	1.20565	0.407	0.292	5.23692e-112
KDM6A	2.70149e-116	0.799462	0.598	0.542	5.63935e-112
PPA1	3.31842e-116	-0.746688	0.194	0.385	6.9272e-112
RSL1D1	4.6799e-116	-0.460656	0.403	0.644	9.7693e-112
TALDO1	4.68869e-116	-0.387391	0.81	0.913	9.78764e-112
GRSF1	7.24083e-116	-0.580643	0.198	0.401	1.51152e-111
MRPS12	8.14523e-116	-0.802312	0.12	0.29	1.70032e-111
HSPB1	1.01845e-115	-1.04153	0.103	0.26	2.126e-111
IL6R	1.13211e-115	0.938008	0.538	0.462	2.36329e-111
HACD4	1.25014e-115	-0.494864	0.346	0.58	2.60968e-111
CX3CR1	3.11078e-115	-1.22033	0.126	0.288	6.49376e-111
EIF3H	3.35886e-115	-0.370657	0.655	0.854	7.01162e-111
AP1G1	4.16071e-115	0.947285	0.525	0.447	8.68549e-111
ALYREF	4.45737e-115	-0.448554	0.383	0.626	9.30476e-111
PRR13	5.2857e-115	-0.357555	0.713	0.879	1.10339e-110
ECHS1	8.08138e-115	-0.697975	0.145	0.326	1.68699e-110
SUMO3	9.29468e-115	-0.500145	0.319	0.546	1.94026e-110
EIF2S3	1.08064e-114	-0.463961	0.452	0.684	2.25583e-110
NDUFB6	1.39615e-114	-0.560204	0.198	0.401	2.91446e-110
COX14	3.0239e-114	-0.478042	0.302	0.53	6.3124e-110
IGFLR1	3.07696e-114	-0.553333	0.277	0.491	6.42316e-110
RAB8B	3.32485e-114	0.765054	0.646	0.62	6.94063e-110
CD52	4.52874e-114	-0.503586	0.755	0.858	9.45375e-110
GTF2A2	5.26256e-114	-0.510077	0.237	0.451	1.09856e-109
RAB8A	7.8117e-114	-0.491328	0.322	0.549	1.63069e-109
SF3B4	8.59639e-114	-0.573001	0.193	0.393	1.7945e-109
MPG	1.29906e-113	-0.589009	0.199	0.399	2.71178e-109
ETHE1	1.86349e-113	-0.669196	0.204	0.396	3.89004e-109
PSMA6	1.89646e-113	-0.418351	0.442	0.682	3.95886e-109
GAS5	2.12475e-113	-0.525406	0.342	0.564	4.43541e-109
RPL37	2.17395e-113	-0.214462	0.982	0.971	4.53813e-109
ANXA4	2.57647e-113	-0.761549	0.143	0.319	5.37837e-109
SNRPB	3.20327e-113	-0.431619	0.426	0.665	6.68682e-109
BLVRB	3.67913e-113	-0.43245	0.592	0.791	7.68017e-109
SGMS1	4.02345e-113	1.00984	0.52	0.441	8.39895e-109
UXT	9.84407e-113	-0.458982	0.44	0.672	2.05495e-108
HSD17B11	1.08621e-112	-0.502253	0.346	0.577	2.26747e-108
TNFSF10	1.43662e-112	-0.700656	0.275	0.477	2.99894e-108
BRI3	1.43978e-112	-0.287997	0.901	0.957	3.00555e-108
ORAI1	1.92421e-112	-0.694239	0.143	0.321	4.01679e-108
NDUFS3	2.43974e-112	-0.647445	0.175	0.364	5.09295e-108
ANAPC11	5.25514e-112	-0.409423	0.481	0.726	1.09701e-107
SHMT2	5.4188e-112	-1.15502	0.062	0.198	1.13118e-107
ST13	5.87462e-112	-0.478023	0.342	0.573	1.22633e-107
NOP53	8.70235e-112	-0.441878	0.481	0.711	1.81662e-107
NEDD8	1.04997e-111	-0.401862	0.502	0.741	2.19181e-107
C19orf38	1.09989e-111	-0.437168	0.51	0.738	2.29603e-107
NDUFS2	1.15322e-111	-0.560729	0.179	0.372	2.40735e-107
CTSS	1.18957e-111	-0.233711	0.983	0.986	2.48323e-107
SUCLG1	1.47601e-111	-0.638506	0.158	0.341	3.08117e-107
CARD16	1.62985e-111	-0.375444	0.648	0.839	3.40231e-107
EMC4	3.30167e-111	-0.62873	0.174	0.362	6.89223e-107
AC022217.3	4.13471e-111	0.854135	0.595	0.543	8.6312e-107
CNIH1	6.71201e-111	-0.605148	0.196	0.391	1.40113e-106
PRDX4	8.16759e-111	-1.1182	0.072	0.211	1.70498e-106
MICOS13	1.24204e-110	-0.479818	0.284	0.505	2.59277e-106
PPT1	1.4811e-110	-0.465551	0.431	0.662	3.0918e-106
FAM107B	2.62999e-110	0.749318	0.681	0.658	5.49009e-106
UNC119	3.33086e-110	-0.702127	0.282	0.484	6.95317e-106
SNRPA	4.61166e-110	-0.616629	0.19	0.381	9.62685e-106
BANF1	5.55339e-110	-0.467681	0.347	0.578	1.15927e-105
PFKL	1.07733e-109	-0.530453	0.241	0.448	2.24893e-105
MAT2B	1.11154e-109	-0.873785	0.1	0.253	2.32033e-105
PHPT1	1.2181e-109	-0.485787	0.268	0.484	2.54278e-105
TMEM14B	1.32594e-109	-0.445993	0.299	0.528	2.7679e-105
CCT5	1.42212e-109	-0.500082	0.287	0.505	2.96868e-105
SAT1	1.60253e-109	0.378074	0.996	0.996	3.34529e-105
IMP3	1.75316e-109	-0.828956	0.108	0.265	3.65972e-105
GRHPR	1.92099e-109	-0.631971	0.153	0.333	4.01006e-105
CLNS1A	2.9128e-109	-0.564199	0.196	0.392	6.08048e-105
ATP5MF	3.63535e-109	-0.340384	0.671	0.856	7.5888e-105
TGFBR2	3.78253e-109	0.68682	0.69	0.679	7.89602e-105
RNF7	4.34725e-109	-0.417736	0.429	0.672	9.07488e-105
PELI2	8.86651e-109	0.819375	0.584	0.531	1.85088e-104
CD58	9.68714e-109	0.717665	0.667	0.656	2.02219e-104
BAX	1.26789e-108	-0.413377	0.455	0.699	2.64673e-104
VAMP5	1.70306e-108	-0.658563	0.381	0.577	3.55515e-104
RPL37A	1.84371e-108	-0.274843	0.938	0.957	3.84874e-104
PPP1CB	2.55208e-108	0.632104	0.721	0.722	5.32747e-104
MIR222HG	3.35973e-108	1.32561	0.34	0.223	7.01343e-104
TMEM141	3.49808e-108	-0.732003	0.132	0.299	7.30224e-104
NAGA	4.84377e-108	-0.606754	0.193	0.385	1.01114e-103
MPC2	5.10142e-108	-0.696137	0.137	0.306	1.06492e-103
WBP2	5.35781e-108	-0.52165	0.221	0.425	1.11844e-103
PRDX6	6.06286e-108	-0.41502	0.379	0.621	1.26562e-103
HTATIP2	8.79117e-108	-0.746322	0.124	0.288	1.83516e-103
LGALS3	1.25609e-107	-0.311413	0.815	0.921	2.62209e-103
MRPS7	1.94204e-107	-0.791052	0.109	0.267	4.05401e-103
VASP	2.17643e-107	-0.422053	0.642	0.822	4.5433e-103
EIF1	2.83817e-107	-0.204313	0.989	0.993	5.92468e-103
MIF	4.29583e-107	-0.378547	0.587	0.8	8.96755e-103
CNN2	4.55988e-107	-0.445515	0.438	0.665	9.51875e-103
VDAC3	5.20437e-107	-0.688699	0.127	0.293	1.08641e-102
UBXN1	5.65314e-107	-0.410002	0.485	0.713	1.18009e-102
S1PR4	8.45844e-107	-0.698768	0.157	0.33	1.7657e-102
LILRB4	9.95046e-107	-0.601992	0.225	0.42	2.07716e-102
CDK14	1.0806e-106	1.05946	0.454	0.355	2.25575e-102
TAF9	1.29115e-106	-0.586954	0.147	0.318	2.69528e-102
IGFBP7	1.34497e-106	-0.710172	0.159	0.333	2.80762e-102
APEH	1.71879e-106	-0.903681	0.083	0.226	3.58798e-102
COX7B	1.84142e-106	-0.362509	0.595	0.806	3.84395e-102
AAMP	4.02819e-106	-0.590505	0.166	0.349	8.40884e-102
STOML2	4.28678e-106	-0.958619	0.08	0.221	8.94864e-102
TMEM258	5.19883e-106	-0.372977	0.567	0.794	1.08525e-101
FUNDC2	5.69284e-106	-0.485173	0.256	0.466	1.18838e-101
MAPKAPK2	6.28547e-106	0.730449	0.641	0.625	1.31209e-101
PSMC3	6.90122e-106	-0.643965	0.161	0.339	1.44063e-101
PDCD6	7.03845e-106	-0.440827	0.273	0.492	1.46928e-101
TMEM176A	8.70133e-106	-0.760337	0.286	0.463	1.8164e-101
PDCD5	8.84516e-106	-0.531058	0.216	0.416	1.84643e-101
SERBP1	9.00004e-106	-0.408434	0.422	0.652	1.87876e-101
AP2S1	9.01166e-106	-0.349888	0.665	0.854	1.88118e-101
PMVK	9.94552e-106	-1.03006	0.072	0.208	2.07613e-101
SCIMP	1.06141e-105	-0.623048	0.217	0.407	2.21569e-101
GABARAPL2	1.06331e-105	-0.424568	0.336	0.568	2.21966e-101
MRPL16	1.1007e-105	-0.761782	0.115	0.273	2.29772e-101
CYBC1	1.25575e-105	-0.586115	0.177	0.363	2.62138e-101
THAP11	1.38595e-105	-1.01852	0.068	0.202	2.89317e-101
C7orf50	1.51686e-105	-0.60243	0.179	0.362	3.16644e-101
SEC13	1.68353e-105	-0.498344	0.244	0.451	3.51437e-101
QARS	1.74754e-105	-0.575908	0.197	0.386	3.64799e-101
EIF4B	1.89189e-105	-0.419584	0.497	0.719	3.94932e-101
CHMP5	2.58477e-105	-0.785335	0.12	0.279	5.3957e-101
CACYBP	2.96913e-105	-0.627794	0.171	0.352	6.19806e-101
CPEB4	3.20757e-105	0.962447	0.501	0.416	6.6958e-101
PDCL3	3.98751e-105	-1.00469	0.077	0.215	8.32393e-101
HIKESHI	4.14697e-105	-0.785447	0.099	0.25	8.65681e-101
FAM32A	4.39405e-105	-0.498062	0.239	0.443	9.17259e-101
EIF3D	8.40616e-105	-0.456887	0.323	0.545	1.75479e-100
RAB5C	9.56618e-105	-0.38047	0.512	0.736	1.99694e-100
TBL1X	1.01818e-104	0.822146	0.583	0.533	2.12546e-100
SMIM25	1.34657e-104	-0.766661	0.444	0.631	2.81096e-100
SEPTIN9	1.60236e-104	-0.462813	0.53	0.736	3.34493e-100
IQGAP1	1.66514e-104	0.35902	0.917	0.939	3.47597e-100
CALHM2	1.67967e-104	-1.44883	0.038	0.153	3.50631e-100
NDUFA8	1.72102e-104	-1.03894	0.062	0.192	3.59263e-100
ETFA	2.28213e-104	-0.518458	0.193	0.384	4.76394e-100
MRPS15	2.43365e-104	-0.60909	0.172	0.353	5.08023e-100
CDC42	2.655e-104	-0.287017	0.846	0.948	5.54232e-100
PLSCR3	3.13744e-104	-0.683674	0.134	0.298	6.5494e-100
ATAD2B	3.46715e-104	0.772286	0.606	0.566	7.23767e-100
BLVRA	4.53907e-104	-0.463462	0.385	0.607	9.4753e-100
OVCA2	4.65572e-104	-0.793404	0.106	0.258	9.71881e-100
SHISA5	4.74641e-104	-0.46447	0.281	0.492	9.90814e-100
SLC43A2	6.52114e-104	0.70915	0.664	0.657	1.36129e-99
PEPD	7.38979e-104	-0.55116	0.195	0.384	1.54262e-99
RPS29	7.99486e-104	-0.335012	0.882	0.94	1.66893e-99
RPL31	8.50318e-104	-0.278128	0.892	0.948	1.77504e-99
CELF2	9.29761e-104	0.32788	0.86	0.883	1.94088e-99
ATP5MD	9.80838e-104	-0.380555	0.535	0.761	2.0475e-99
ARHGAP24	1.02182e-103	1.03631	0.479	0.382	2.13304e-99
AKR1A1	1.11276e-103	-0.463027	0.31	0.529	2.32289e-99
TMEM109	1.14122e-103	-0.996578	0.074	0.209	2.3823e-99
YTHDC1	1.56439e-103	0.723502	0.613	0.579	3.26567e-99
FAM89B	1.58303e-103	-0.559168	0.207	0.397	3.30457e-99
ADRM1	2.02264e-103	-0.45281	0.299	0.52	4.22227e-99
IGSF6	2.4439e-103	-0.400178	0.609	0.799	5.10164e-99
CMTM7	2.71573e-103	-0.447707	0.315	0.536	5.66909e-99
IAH1	3.14411e-103	-0.662324	0.147	0.317	6.56333e-99
SAP18	5.57499e-103	-0.364026	0.512	0.746	1.16378e-98
SERP1	6.31775e-103	-0.283611	0.838	0.935	1.31883e-98
COMMD8	8.32786e-103	-0.601845	0.138	0.305	1.73844e-98
ASPH	8.37586e-103	1.47572	0.389	0.286	1.74846e-98
PPM1G	8.41367e-103	-0.472712	0.249	0.457	1.75635e-98
RPS27L	1.45498e-102	-0.489642	0.341	0.563	3.03727e-98
CALML4	1.92983e-102	-1.18429	0.068	0.196	4.02853e-98
TAP1	1.93015e-102	-0.616194	0.157	0.329	4.02919e-98
LYL1	2.50991e-102	-0.616326	0.163	0.337	5.23944e-98
WDR26	2.68882e-102	0.803747	0.582	0.532	5.61291e-98
ESD	3.67832e-102	-0.611026	0.183	0.365	7.67849e-98
CPD	3.75427e-102	0.969176	0.527	0.456	7.83703e-98
RBCK1	3.93145e-102	-0.457968	0.252	0.461	8.20691e-98
NDUFA7	4.42637e-102	-0.42613	0.348	0.579	9.24005e-98
AC104809.2	4.95374e-102	-6.30588	0.001	0.082	1.03409e-97
EEPD1	5.12986e-102	1.39059	0.369	0.263	1.07086e-97
TMEM9B	5.28689e-102	-0.567969	0.201	0.389	1.10364e-97
SNHG8	7.55265e-102	-0.5259	0.236	0.433	1.57662e-97
PIAS1	8.46335e-102	0.592901	0.7	0.704	1.76673e-97
CCNDBP1	1.1253e-101	-0.567351	0.168	0.346	2.34906e-97
DHRS4	1.24708e-101	-0.4953	0.242	0.445	2.60329e-97
MRPL18	1.64756e-101	-0.830954	0.074	0.209	3.43927e-97
NAXE	2.53853e-101	-0.793672	0.111	0.264	5.29918e-97
ZFAND6	3.19108e-101	0.597126	0.67	0.657	6.66137e-97
PPP3CA	4.58598e-101	0.682291	0.673	0.665	9.57323e-97
CDKN2D	4.5877e-101	-0.419142	0.578	0.777	9.57682e-97
NEDD9	4.61982e-101	0.582089	0.682	0.668	9.64387e-97
ZNF703	4.72313e-101	-1.04166	0.102	0.243	9.85954e-97
PSMC4	4.94387e-101	-0.629811	0.144	0.314	1.03203e-96
IMPA2	5.88435e-101	-0.596725	0.194	0.376	1.22836e-96
MRPL14	6.65814e-101	-0.526377	0.161	0.338	1.38989e-96
LILRB2	8.27369e-101	-0.509617	0.644	0.815	1.72713e-96
NME1	9.1623e-101	-1.09642	0.064	0.191	1.91263e-96
YIF1B	1.02574e-100	-0.556759	0.189	0.371	2.14124e-96
PLEKHJ1	1.17639e-100	-0.592914	0.153	0.325	2.45571e-96
ADA	1.39793e-100	-1.95673	0.029	0.134	2.91818e-96
TOMM20	1.43272e-100	-0.408358	0.431	0.663	2.9908e-96
STX10	1.68411e-100	-0.419589	0.397	0.629	3.51558e-96
TMED2	1.69644e-100	-0.492077	0.237	0.438	3.54132e-96
MTMR3	1.92611e-100	0.850961	0.532	0.467	4.02074e-96
TMPO	1.98085e-100	-0.560757	0.276	0.479	4.13503e-96
HSPD1	2.56984e-100	-0.528147	0.202	0.386	5.36454e-96
AIP	2.63057e-100	-0.542344	0.18	0.361	5.49132e-96
SEC11C	3.68528e-100	-0.724633	0.117	0.271	7.69302e-96
PSMD3	4.5378e-100	-0.657273	0.117	0.273	9.47266e-96
EAF1	5.86431e-100	0.90514	0.521	0.445	1.22417e-95
TRAPPC6A	6.53073e-100	-0.683057	0.125	0.281	1.36329e-95
MTMR11	7.88769e-100	-0.806322	0.119	0.27	1.64656e-95
GATAD2A	8.3412e-100	0.810334	0.585	0.549	1.74123e-95
RAB1A	9.48731e-100	0.581275	0.718	0.735	1.98048e-95
TXN2	1.11388e-99	-0.506812	0.225	0.422	2.32523e-95
ATP6V0E1	1.31788e-99	-0.353281	0.605	0.812	2.75108e-95
WDR61	1.35338e-99	-0.712079	0.098	0.244	2.82518e-95
HDAC1	1.66895e-99	-0.550154	0.161	0.335	3.48393e-95
PPP1R14B	2.89365e-99	-0.531354	0.214	0.401	6.0405e-95
RNASEK	3.48151e-99	-0.227863	0.925	0.962	7.26764e-95
LRP10	3.6376e-99	-0.622191	0.153	0.321	7.59348e-95
DCTN2	3.67684e-99	-0.540778	0.193	0.377	7.67539e-95
COPS5	5.00413e-99	-0.706999	0.112	0.265	1.04461e-94
CKB	5.65503e-99	-3.77185	0.009	0.095	1.18049e-94
SP3	6.7224e-99	0.635117	0.677	0.678	1.4033e-94
ZBTB43	8.45194e-99	1.00715	0.489	0.413	1.76434e-94
CNIH4	9.70926e-99	-0.594002	0.2	0.38	2.02681e-94
TAX1BP3	1.04961e-98	-0.892237	0.09	0.228	2.19106e-94
MRPL40	1.0782e-98	-0.839937	0.094	0.235	2.25075e-94
ACP1	1.23163e-98	-0.554509	0.165	0.339	2.57103e-94
POLR1D	1.32567e-98	-0.425602	0.365	0.593	2.76734e-94
CUL3	1.35538e-98	0.636992	0.657	0.646	2.82935e-94
CSRP1	1.59538e-98	-0.761362	0.102	0.249	3.33035e-94
GIMAP4	2.41957e-98	-0.66275	0.179	0.35	5.05085e-94
TEX264	2.9015e-98	-0.596539	0.142	0.306	6.05687e-94
EPRS	3.53784e-98	-0.759398	0.101	0.245	7.38523e-94
BLOC1S1	5.20883e-98	-0.363501	0.67	0.851	1.08734e-93
GLUL	7.93162e-98	0.568541	0.807	0.817	1.65573e-93
C1orf43	8.97065e-98	-0.430005	0.303	0.516	1.87262e-93
TMEM50A	9.34075e-98	-0.361478	0.462	0.695	1.94988e-93
SETBP1	1.20872e-97	-2.89022	0.017	0.11	2.5232e-93
ARL2BP	1.30626e-97	-0.65357	0.127	0.284	2.72682e-93
LRRFIP2	2.15777e-97	0.776701	0.627	0.603	4.50434e-93
RNF5	3.14248e-97	-0.758946	0.098	0.241	6.55992e-93
TIMMDC1	3.21763e-97	-0.938927	0.076	0.207	6.71681e-93
COA4	3.24009e-97	-0.860491	0.088	0.225	6.7637e-93
IMPDH2	4.61551e-97	-1.06576	0.062	0.185	9.63488e-93
TRADD	5.05606e-97	-0.671779	0.115	0.267	1.05545e-92
ATP5F1D	5.82223e-97	-0.334887	0.66	0.852	1.21539e-92
CCDC124	7.93726e-97	-0.488451	0.194	0.379	1.6569e-92
PSMG2	9.15277e-97	-0.464953	0.247	0.448	1.91064e-92
ATP5MC1	1.31406e-96	-0.414694	0.269	0.479	2.74309e-92
ADI1	1.31644e-96	-0.496625	0.201	0.385	2.74806e-92
SYTL1	1.34186e-96	-0.887724	0.118	0.263	2.80113e-92
NENF	1.61946e-96	-0.57485	0.186	0.364	3.38062e-92
EIF4EBP1	2.03266e-96	-0.427474	0.356	0.576	4.24317e-92
CEP170	2.43487e-96	0.776838	0.606	0.577	5.0828e-92
DNASE2	2.48315e-96	-0.996346	0.085	0.218	5.18358e-92
SBF2	2.91066e-96	0.539384	0.722	0.718	6.07601e-92
AL450992.3	3.46035e-96	1.46671	0.349	0.242	7.22347e-92
BTAF1	3.61972e-96	0.830099	0.56	0.521	7.55616e-92
RB1CC1	3.87936e-96	0.782984	0.585	0.546	8.09816e-92
MFNG	4.85653e-96	-0.624671	0.141	0.302	1.0138e-91
PEA15	8.80641e-96	-0.607638	0.183	0.355	1.83834e-91
MTPN	9.15705e-96	-0.367918	0.656	0.847	1.91153e-91
SELENOF	1.04131e-95	-0.405423	0.33	0.549	2.17373e-91
IGBP1	1.40893e-95	-0.43244	0.295	0.507	2.94115e-91
AC020651.2	1.44319e-95	-3.05756	0.014	0.102	3.01266e-91
SNRPE	1.45373e-95	-0.4683	0.225	0.418	3.03466e-91
CLEC4A	1.62808e-95	-0.468386	0.323	0.531	3.39863e-91
MRPL4	2.36992e-95	-0.61867	0.124	0.279	4.9472e-91
GALK1	2.83636e-95	-0.708484	0.122	0.274	5.9209e-91
RPS20	2.8622e-95	-0.31303	0.759	0.892	5.97483e-91
PHF21A	2.8838e-95	0.820728	0.573	0.525	6.01993e-91
CIAO2B	2.942e-95	-0.382854	0.36	0.588	6.14142e-91
CPNE3	3.14885e-95	-0.533584	0.181	0.357	6.57323e-91
SNX9	3.38545e-95	0.56322	0.698	0.681	7.06712e-91
TEX14	3.7734e-95	0.920548	0.661	0.61	7.87697e-91
SMCO4	3.92719e-95	-0.441398	0.268	0.47	8.19802e-91
KRT10	5.87057e-95	-0.387814	0.37	0.596	1.22548e-90
ADGRE2	6.23941e-95	0.677655	0.676	0.663	1.30248e-90
CDC42SE2	8.69144e-95	0.598392	0.702	0.703	1.81434e-90
TSR3	9.13976e-95	-0.610937	0.143	0.304	1.90793e-90
VPS35	1.15361e-94	-0.522866	0.237	0.426	2.40817e-90
MRPL34	1.48502e-94	-0.522911	0.186	0.364	3.09997e-90
COA3	1.52914e-94	-0.604375	0.148	0.311	3.19207e-90
PRMT1	1.93014e-94	-0.622572	0.122	0.274	4.02917e-90
ABCA1	3.47803e-94	0.966151	0.536	0.462	7.26039e-90
JUNB	3.93113e-94	-0.285569	0.968	0.981	8.20624e-90
NR4A2	6.00762e-94	0.636689	0.704	0.682	1.25409e-89
PRDX2	7.15968e-94	-0.895335	0.098	0.233	1.49458e-89
CLPP	7.36574e-94	-0.791666	0.1	0.24	1.5376e-89
NDUFA11	8.06676e-94	-0.328514	0.623	0.824	1.68394e-89
DRAM2	8.91933e-94	-0.559528	0.17	0.338	1.86191e-89
SELENOW	1.14633e-93	-0.394619	0.351	0.568	2.39296e-89
HAX1	1.27146e-93	-0.581264	0.126	0.279	2.65417e-89
ACAA2	1.53084e-93	-0.572035	0.16	0.326	3.19564e-89
MRTFA	1.72128e-93	0.780447	0.558	0.512	3.59317e-89
RHOF	1.93304e-93	-0.880716	0.105	0.244	4.03522e-89
PUF60	2.15251e-93	-0.482583	0.212	0.399	4.49337e-89
KLF6	2.25722e-93	0.361205	0.951	0.964	4.71196e-89
NUDT21	2.46989e-93	-0.65301	0.142	0.299	5.1559e-89
RBX1	3.11234e-93	-0.394636	0.413	0.639	6.49701e-89
EIF3M	3.26572e-93	-0.374297	0.435	0.662	6.81719e-89
CD300E	3.93032e-93	0.705269	0.701	0.689	8.20454e-89
PARP1	4.47814e-93	-0.741291	0.107	0.25	9.34812e-89
GTF3C6	4.49821e-93	-0.475832	0.215	0.403	9.39002e-89
CAPG	5.65492e-93	-0.476142	0.575	0.728	1.18046e-88
CLTA	6.31101e-93	-0.366449	0.449	0.68	1.31742e-88
DDX21	6.88626e-93	0.513983	0.803	0.832	1.43751e-88
MCTS1	8.70498e-93	-0.701948	0.105	0.247	1.81716e-88
GSK3A	9.7627e-93	-0.574778	0.15	0.313	2.03796e-88
LINC00937	1.05208e-92	1.0027	0.433	0.334	2.19621e-88
COPS6	1.07159e-92	-0.481766	0.198	0.379	2.23694e-88
EID1	1.95141e-92	-0.362462	0.505	0.724	4.07356e-88
ALDH2	2.19327e-92	-0.483992	0.422	0.613	4.57846e-88
ZNF331	2.58376e-92	1.11241	0.494	0.401	5.3936e-88
COMMD9	2.86305e-92	-0.451808	0.235	0.426	5.97662e-88
XRCC5	4.02113e-92	-0.371896	0.429	0.656	8.39411e-88
HNRNPA0	4.14078e-92	-0.3921	0.461	0.681	8.64388e-88
NCOA4	5.26627e-92	-0.376842	0.446	0.668	1.09933e-87
TMEM176B	5.54033e-92	-0.5921	0.439	0.592	1.15654e-87
SNF8	5.90306e-92	-0.430665	0.284	0.49	1.23226e-87
NDUFA9	6.30008e-92	-0.555831	0.14	0.299	1.31514e-87
TRAF3	7.04652e-92	0.698205	0.608	0.574	1.47096e-87
UBE2M	7.13708e-92	-0.381045	0.286	0.499	1.48987e-87
ANP32B	7.86135e-92	-0.344512	0.575	0.787	1.64106e-87
RGS10	9.71732e-92	-0.37649	0.45	0.675	2.02849e-87
LONRF3	2.18705e-91	1.24316	0.319	0.213	4.56547e-87
METTL26	2.19777e-91	-0.412121	0.266	0.467	4.58784e-87
SELPLG	2.26238e-91	-0.465073	0.353	0.557	4.72272e-87
FAM162A	2.64663e-91	-0.849059	0.087	0.217	5.52484e-87
JPT1	3.53253e-91	-0.413553	0.343	0.551	7.37415e-87
BSG	3.99031e-91	-0.362543	0.401	0.626	8.32978e-87
TMEM134	3.99855e-91	-0.867796	0.092	0.224	8.34698e-87
YIPF3	4.82558e-91	-0.531531	0.158	0.324	1.00734e-86
URM1	6.84185e-91	-0.491506	0.155	0.319	1.42824e-86
NDUFV2	7.11634e-91	-0.393031	0.335	0.548	1.48554e-86
NFKB1	7.86751e-91	0.591359	0.708	0.707	1.64234e-86
FYN	8.19119e-91	0.605702	0.711	0.719	1.70991e-86
NAA20	9.73218e-91	-0.544713	0.136	0.291	2.03159e-86
LSM5	1.0349e-90	-0.530998	0.148	0.308	2.16036e-86
SDF2L1	1.12074e-90	-0.618264	0.124	0.272	2.33954e-86
CHD2	1.13892e-90	0.652615	0.62	0.597	2.3775e-86
HAGH	1.74486e-90	-0.615087	0.127	0.277	3.6424e-86
SNRPD1	1.95385e-90	-0.451637	0.215	0.4	4.07867e-86
EIF6	2.61876e-90	-0.405485	0.308	0.517	5.46666e-86
FKBP8	2.97082e-90	-0.350431	0.53	0.745	6.20158e-86
ELL	3.11454e-90	0.995311	0.45	0.371	6.5016e-86
LAP3	4.08067e-90	-0.433277	0.383	0.593	8.51841e-86
PAN3	4.32982e-90	0.59018	0.67	0.662	9.0385e-86
DBNL	4.71542e-90	-0.375768	0.4	0.624	9.84345e-86
VDAC2	5.00366e-90	-0.36682	0.444	0.668	1.04451e-85
SLC7A5	5.19576e-90	1.13994	0.383	0.288	1.08461e-85
ZNHIT3	5.62886e-90	-0.794683	0.084	0.215	1.17503e-85
MRPS34	6.03943e-90	-0.401434	0.276	0.481	1.26073e-85
MRPS36	6.53933e-90	-0.471055	0.203	0.381	1.36508e-85
CIRBP	7.30371e-90	-0.37912	0.589	0.786	1.52465e-85
NDUFB7	7.31453e-90	-0.368373	0.432	0.661	1.52691e-85
AUP1	9.24668e-90	-0.350818	0.35	0.573	1.93025e-85
BTK	9.56857e-90	-0.557373	0.156	0.317	1.99744e-85
DNAJC4	9.86562e-90	-0.487938	0.251	0.442	2.05945e-85
STAT3	9.9833e-90	0.626787	0.704	0.712	2.08401e-85
SLC25A39	1.11453e-89	-0.591901	0.132	0.284	2.32657e-85
POLR2K	1.26409e-89	-0.607976	0.118	0.264	2.63879e-85
PCMT1	1.35981e-89	-0.423288	0.221	0.408	2.83861e-85
APOBEC3G	1.4202e-89	-1.09641	0.055	0.167	2.96467e-85
ZMIZ1	1.48051e-89	0.714996	0.635	0.628	3.09057e-85
C19orf53	1.5977e-89	-0.348523	0.436	0.672	3.33521e-85
MICAL2	1.70492e-89	0.906474	0.495	0.422	3.55901e-85
LSP1	1.9755e-89	-0.256241	0.917	0.964	4.12386e-85
45357	2.28849e-89	0.733684	0.562	0.514	4.77722e-85
MINK1	2.48208e-89	1.02588	0.435	0.353	5.18135e-85
KDM7A	2.75219e-89	0.81043	0.556	0.512	5.74519e-85
LEPROTL1	3.11812e-89	-0.487802	0.18	0.349	6.50908e-85
TIMM13	3.36438e-89	-0.48035	0.206	0.385	7.02315e-85
ADSL	6.42145e-89	-0.646925	0.121	0.267	1.34048e-84
SSB	7.52174e-89	-0.428068	0.246	0.434	1.57016e-84
TMEM170B	7.57354e-89	0.723652	0.629	0.605	1.58098e-84
SUMO1	8.32446e-89	-0.355927	0.33	0.548	1.73773e-84
WASHC3	8.52567e-89	-0.766595	0.085	0.215	1.77973e-84
OAS2	1.03293e-88	-0.821672	0.099	0.232	2.15624e-84
NECAP2	1.06962e-88	-0.561108	0.169	0.331	2.23283e-84
HPRT1	1.07713e-88	-0.641776	0.108	0.249	2.24852e-84
ACTN1	1.17151e-88	0.896169	0.491	0.416	2.44553e-84
RREB1	1.21838e-88	0.887022	0.506	0.444	2.54336e-84
G0S2	1.30435e-88	0.566655	0.662	0.544	2.72283e-84
ARL15	1.34912e-88	0.811436	0.533	0.473	2.81629e-84
PDHB	1.42669e-88	-0.783125	0.086	0.216	2.97822e-84
LRPAP1	1.47636e-88	-0.372634	0.387	0.605	3.0819e-84
ACAA1	1.50355e-88	-0.383169	0.324	0.533	3.13866e-84
IFI6	1.82874e-88	-0.662125	0.258	0.431	3.81749e-84
NUDT16	1.86424e-88	-0.422145	0.261	0.456	3.8916e-84
PTPMT1	1.8847e-88	-0.658015	0.127	0.274	3.93431e-84
NRIP1	3.03731e-88	0.702301	0.649	0.645	6.34038e-84
SNX5	3.4271e-88	-0.514717	0.191	0.362	7.15407e-84
PTPN6	3.5692e-88	-0.445574	0.639	0.814	7.45071e-84
SET	3.63014e-88	-0.319047	0.612	0.808	7.57792e-84
ITPA	4.03667e-88	-0.616278	0.135	0.285	8.42654e-84
FGD4	5.12371e-88	0.793701	0.558	0.515	1.06957e-83
SURF1	5.16038e-88	-0.44808	0.24	0.432	1.07723e-83
TMBIM6	5.29612e-88	-0.317683	0.645	0.831	1.10556e-83
CCDC85B	1.44721e-87	-0.373671	0.351	0.565	3.02105e-83
ACAP2	1.75386e-87	0.404899	0.85	0.893	3.66118e-83
RNF141	2.54092e-87	-0.590528	0.141	0.293	5.30418e-83
REEP5	3.49015e-87	-0.341298	0.47	0.689	7.28568e-83
TMEM219	3.89417e-87	-0.346632	0.509	0.732	8.12908e-83
SSBP1	4.72521e-87	-0.345371	0.328	0.543	9.86387e-83
ISCU	6.38999e-87	-0.360393	0.303	0.514	1.33391e-82
MIF4GD	9.90821e-87	-0.682163	0.105	0.241	2.06834e-82
RNF126	1.71435e-86	-0.534966	0.163	0.325	3.5787e-82
LSM10	1.76566e-86	-0.365902	0.276	0.477	3.68581e-82
ARFGEF2	2.79763e-86	0.865208	0.502	0.441	5.84006e-82
SNAPIN	2.90478e-86	-0.964715	0.067	0.184	6.06372e-82
BCKDHA	3.32273e-86	-0.524756	0.156	0.315	6.93621e-82
SERTAD3	3.38048e-86	-0.568511	0.136	0.286	7.05676e-82
MKLN1	3.5876e-86	0.781744	0.541	0.497	7.48912e-82
PCBD1	3.77541e-86	-0.778604	0.088	0.215	7.88116e-82
NUP98	3.9545e-86	0.795333	0.552	0.511	8.25502e-82
MARCKSL1	5.17631e-86	-0.611163	0.239	0.41	1.08056e-81
TOMM7	6.78966e-86	-0.2758	0.758	0.904	1.41734e-81
ITGAX	6.8451e-86	0.602764	0.713	0.734	1.42891e-81
MRPL54	7.79644e-86	-0.357252	0.391	0.613	1.62751e-81
AL138720.1	7.91411e-86	1.13152	0.385	0.286	1.65207e-81
NIBAN2	8.34278e-86	1.12001	0.379	0.286	1.74156e-81
GNG5	1.36625e-85	-0.245793	0.83	0.939	2.85205e-81
PSMF1	1.37336e-85	-0.364653	0.306	0.516	2.86689e-81
PHF19	2.53991e-85	-0.92911	0.09	0.215	5.30206e-81
COX8A	2.62097e-85	-0.263912	0.79	0.913	5.47128e-81
AP1M1	3.63824e-85	-0.477299	0.199	0.371	7.59484e-81
MRPS18B	3.98636e-85	-0.878977	0.059	0.172	8.32153e-81
ZNHIT1	4.1079e-85	-0.349876	0.356	0.58	8.57524e-81
PSMD6	4.83761e-85	-0.431385	0.194	0.368	1.00985e-80
HLA-DMB	6.36637e-85	-0.432824	0.375	0.568	1.32898e-80
RNF187	7.80718e-85	-0.506315	0.171	0.334	1.62975e-80
VPS13B	1.07568e-84	0.66992	0.598	0.577	2.24549e-80
POLDIP2	1.25376e-84	-0.730244	0.086	0.212	2.61721e-80
KYNU	1.27602e-84	0.678973	0.636	0.625	2.66369e-80
GPS1	1.5173e-84	-0.504681	0.145	0.3	3.16736e-80
SLC12A6	1.61029e-84	0.925661	0.493	0.434	3.36149e-80
MT2A	1.62224e-84	-0.502239	0.456	0.636	3.38642e-80
QSOX1	1.73222e-84	0.871977	0.515	0.461	3.61601e-80
FAM110A	2.20357e-84	-0.758917	0.145	0.291	4.59996e-80
TMED3	2.2383e-84	-0.845531	0.081	0.204	4.67246e-80
RBM42	2.26505e-84	-0.432514	0.175	0.342	4.72828e-80
CDK4	2.47393e-84	-1.28721	0.037	0.135	5.16432e-80
PSME4	3.31968e-84	0.818365	0.532	0.482	6.92983e-80
GADD45GIP1	3.32076e-84	-0.436825	0.213	0.391	6.93209e-80
MOB1A	3.74509e-84	-0.33236	0.506	0.72	7.81787e-80
ECI1	4.76086e-84	-0.47592	0.166	0.327	9.9383e-80
SCAMP2	4.92776e-84	-0.386838	0.283	0.48	1.02867e-79
PER1	5.33656e-84	0.672436	0.635	0.627	1.11401e-79
GMPR2	5.88852e-84	-0.765307	0.088	0.213	1.22923e-79
NUDT22	6.63889e-84	-0.562231	0.134	0.282	1.38587e-79
ZFC3H1	7.82829e-84	0.660852	0.61	0.598	1.63416e-79
VMA21	1.09115e-83	-0.369804	0.248	0.439	2.27777e-79
ZNF581	1.11885e-83	-0.707185	0.117	0.254	2.3356e-79
CZIB	1.32192e-83	-0.676817	0.107	0.241	2.7595e-79
TOMM5	1.43834e-83	-0.35771	0.267	0.464	3.00254e-79
GRINA	1.5461e-83	-0.334807	0.566	0.776	3.22748e-79
NDUFB11	1.79924e-83	-0.315402	0.589	0.798	3.75591e-79
TMEM126A	1.83354e-83	-0.738407	0.092	0.219	3.82751e-79
CSNK1D	2.48325e-83	0.797823	0.549	0.512	5.18379e-79
RNF167	3.49771e-83	-0.533174	0.173	0.333	7.30146e-79
MS4A4A	5.90401e-83	-1.04006	0.074	0.189	1.23246e-78
LSM6	6.24699e-83	-0.391387	0.28	0.478	1.30406e-78
MAP4K3	6.98102e-83	1.03835	0.493	0.432	1.45729e-78
RBIS	7.07723e-83	-0.367144	0.373	0.592	1.47737e-78
NIPBL	7.1347e-83	0.600643	0.657	0.664	1.48937e-78
KLHL2	7.41366e-83	0.82714	0.52	0.469	1.5476e-78
USP47	7.57365e-83	0.779172	0.534	0.486	1.581e-78
PSMB3	7.91584e-83	-0.286112	0.654	0.841	1.65243e-78
WASF2	8.49376e-83	-0.340217	0.604	0.807	1.77307e-78
RTL8C	8.81177e-83	-0.504881	0.172	0.331	1.83946e-78
TMX1	9.6962e-83	-0.443902	0.166	0.328	2.02408e-78
CCT4	1.10936e-82	-0.401969	0.264	0.455	2.3158e-78
CYB561D2	1.47387e-82	-0.514653	0.13	0.275	3.0767e-78
CYCS	1.72228e-82	-0.366786	0.232	0.415	3.59526e-78
CMTM3	1.85042e-82	-0.455371	0.253	0.434	3.86275e-78
TANK	2.99606e-82	0.54005	0.674	0.678	6.25427e-78
TAPBPL	3.5281e-82	-0.806526	0.077	0.195	7.36491e-78
SUSD6	3.85837e-82	0.761204	0.544	0.503	8.05434e-78
DCPS	3.9551e-82	-0.847249	0.07	0.186	8.25626e-78
MICOS10	4.21446e-82	-0.317159	0.562	0.776	8.79768e-78
MAZ	4.31251e-82	-0.417913	0.267	0.455	9.00237e-78
RAPGEF2	4.34425e-82	0.87194	0.501	0.439	9.06863e-78
CYBB	4.63575e-82	-0.287062	0.828	0.927	9.67714e-78
KDM3B	5.76517e-82	0.796723	0.559	0.525	1.20348e-77
UBR5	8.16774e-82	0.758827	0.538	0.492	1.70502e-77
EAF2	8.9338e-82	-0.607246	0.095	0.223	1.86493e-77
MRPL28	1.1879e-81	-0.422082	0.183	0.349	2.47973e-77
SNAP29	1.19108e-81	-0.442095	0.186	0.351	2.48638e-77
ANAPC16	1.24592e-81	-0.316373	0.374	0.592	2.60085e-77
MRPL57	1.64805e-81	-0.319956	0.279	0.477	3.4403e-77
DR1	1.65516e-81	-0.535255	0.141	0.289	3.45514e-77
DIAPH1	1.93967e-81	0.576439	0.695	0.712	4.04905e-77
MEF2D	2.05805e-81	0.840349	0.506	0.453	4.29619e-77
DUT	2.34943e-81	-0.382539	0.228	0.41	4.90445e-77
MRPL13	2.6349e-81	-0.840836	0.069	0.182	5.50035e-77
MCRIP1	4.56267e-81	-0.466828	0.169	0.327	9.52458e-77
AGTRAP	6.21e-81	-0.351378	0.598	0.784	1.29634e-76
MPC1	1.01559e-80	-0.424545	0.259	0.443	2.12004e-76
MTHFD2	1.13971e-80	-0.463151	0.156	0.31	2.37914e-76
P2RY13	1.31063e-80	-0.479995	0.166	0.319	2.73593e-76
FCN1	1.34163e-80	-0.229336	0.991	0.971	2.80065e-76
FGD2	1.42474e-80	-0.536462	0.17	0.325	2.97416e-76
CWC25	2.80172e-80	0.778344	0.54	0.497	5.84859e-76
ISG15	2.87613e-80	-0.529363	0.228	0.395	6.00392e-76
HNRNPR	2.88032e-80	-0.367281	0.315	0.518	6.01267e-76
KIAA2013	3.5201e-80	-0.439482	0.156	0.31	7.34821e-76
HCLS1	3.69163e-80	-0.277269	0.717	0.876	7.70628e-76
NR3C1	4.07906e-80	0.47077	0.723	0.748	8.51503e-76
MXD1	4.15972e-80	0.691161	0.646	0.635	8.68342e-76
H3F3A	5.51255e-80	-0.151462	0.992	0.991	1.15074e-75
TNS3	6.38665e-80	0.949976	0.451	0.38	1.33321e-75
BTG1	6.71112e-80	0.374245	0.916	0.941	1.40095e-75
MRPL21	7.68586e-80	-0.410873	0.19	0.354	1.60442e-75
CNPPD1	9.33715e-80	-0.444556	0.193	0.357	1.94913e-75
SQOR	1.09176e-79	-0.392792	0.275	0.465	2.27905e-75
SNX15	1.27381e-79	-0.782588	0.076	0.192	2.65908e-75
MRPL52	1.33667e-79	-0.317368	0.33	0.535	2.79029e-75
RASA2	1.36143e-79	0.774693	0.589	0.573	2.84199e-75
IMPDH1	1.47277e-79	-0.357874	0.34	0.545	3.07441e-75
RNF181	1.58945e-79	-0.327622	0.393	0.61	3.31797e-75
MAN1A1	1.64074e-79	0.784461	0.551	0.507	3.42505e-75
CCM2	1.68995e-79	-0.511175	0.215	0.384	3.52778e-75
SLC1A5	2.16152e-79	-0.764663	0.07	0.184	4.51217e-75
TIMM17B	2.18219e-79	-0.331757	0.247	0.436	4.55532e-75
HECA	2.75922e-79	0.619061	0.668	0.671	5.75988e-75
TRAM1	2.96227e-79	-0.33175	0.367	0.576	6.18374e-75
GIMAP1	3.11786e-79	-0.616134	0.12	0.254	6.50853e-75
PQBP1	3.13123e-79	-0.40107	0.237	0.418	6.53643e-75
CISD3	3.64221e-79	-0.449035	0.197	0.362	7.60311e-75
TAF12	3.89626e-79	-0.686017	0.09	0.213	8.13345e-75
LSM2	3.9643e-79	-0.553068	0.11	0.243	8.27548e-75
DGCR6L	5.41922e-79	-0.491876	0.141	0.287	1.13126e-74
GBP4	6.05687e-79	-0.801955	0.104	0.229	1.26437e-74
ZNF524	7.64314e-79	-0.425808	0.184	0.345	1.59551e-74
MPV17	7.70621e-79	-0.490392	0.134	0.277	1.60867e-74
ZNF644	9.34926e-79	0.662145	0.578	0.55	1.95166e-74
ABHD2	1.06655e-78	0.78095	0.527	0.486	2.22642e-74
SLC38A2	1.13191e-78	0.887945	0.517	0.462	2.36286e-74
SELENOT	1.19986e-78	-0.35838	0.28	0.473	2.50471e-74
YWHAH	1.27875e-78	-0.383039	0.303	0.496	2.66939e-74
SULF2	1.29947e-78	0.581227	0.697	0.71	2.71265e-74
RWDD1	1.65946e-78	-0.350439	0.326	0.526	3.46413e-74
VKORC1	1.69639e-78	-0.428907	0.187	0.349	3.54121e-74
TMEM147	2.91666e-78	-0.328046	0.26	0.451	6.08853e-74
ZMAT5	3.80524e-78	-0.743522	0.075	0.19	7.94344e-74
CTSB	4.46717e-78	-0.306792	0.669	0.84	9.32521e-74
TGFBI	4.60487e-78	-0.371731	0.422	0.627	9.61267e-74
ETFB	4.73534e-78	-0.349224	0.281	0.473	9.88502e-74
ORAI3	4.89199e-78	-0.46864	0.154	0.303	1.0212e-73
COMMD3	5.00811e-78	-0.554245	0.11	0.242	1.04544e-73
DCTPP1	5.83371e-78	-1.46366	0.027	0.113	1.21779e-73
LAGE3	6.67017e-78	-0.588429	0.105	0.235	1.3924e-73
C1QA	6.81592e-78	-4.80051	0.006	0.074	1.42282e-73
ALDH16A1	6.99823e-78	-0.707824	0.093	0.216	1.46088e-73
DAP3	7.80781e-78	-0.429112	0.173	0.331	1.62988e-73
TBC1D10C	9.19839e-78	-0.63399	0.131	0.267	1.92016e-73
PRKCB	9.96171e-78	0.320106	0.849	0.885	2.07951e-73
MAPKAPK3	1.00858e-77	-0.379744	0.407	0.605	2.10541e-73
NBDY	1.04227e-77	-0.495994	0.152	0.298	2.17574e-73
GK	1.17539e-77	0.925203	0.491	0.424	2.45363e-73
MRPS21	1.6601e-77	-0.305595	0.389	0.603	3.46547e-73
SRRM2	1.76274e-77	0.287686	0.921	0.951	3.67971e-73
LIMK2	1.83675e-77	1.14117	0.369	0.277	3.83422e-73
MRPL36	2.04888e-77	-0.833427	0.071	0.183	4.27703e-73
SPG21	2.48449e-77	-0.324166	0.374	0.586	5.18637e-73
SH3BP1	3.1739e-77	-0.394265	0.33	0.524	6.62551e-73
EMC6	3.30768e-77	-0.437263	0.178	0.337	6.90478e-73
DDT	3.77221e-77	-0.332496	0.444	0.654	7.87449e-73
SARS	3.83028e-77	-0.48039	0.144	0.287	7.99572e-73
EIF2S2	4.31818e-77	-0.316747	0.312	0.515	9.0142e-73
MAGOH	4.50875e-77	-0.320221	0.331	0.538	9.41201e-73
KIF13A	4.61316e-77	0.761462	0.554	0.51	9.62997e-73
VPS25	4.72715e-77	-0.546642	0.105	0.234	9.86792e-73
ISOC2	4.95795e-77	-1.30831	0.036	0.127	1.03497e-72
ASH1L	5.88098e-77	0.662228	0.591	0.569	1.22765e-72
GABARAPL1	6.90354e-77	0.740286	0.596	0.568	1.44111e-72
HVCN1	7.08509e-77	-0.402167	0.195	0.359	1.47901e-72
SLC2A6	8.69832e-77	-0.711004	0.2	0.351	1.81577e-72
CUEDC2	9.19422e-77	-0.444743	0.17	0.324	1.91929e-72
SMIM12	1.59415e-76	-0.564723	0.101	0.227	3.32779e-72
ENO1	1.72775e-76	-0.259718	0.769	0.9	3.60668e-72
MRPS18C	1.94028e-76	-0.530593	0.121	0.256	4.05034e-72
EXOSC5	2.14931e-76	-0.929586	0.063	0.169	4.48669e-72
SSRP1	2.18048e-76	-0.684022	0.087	0.205	4.55175e-72
ERC1	2.42648e-76	0.771903	0.541	0.5	5.06529e-72
VPS26B	2.45126e-76	-0.528971	0.133	0.272	5.11701e-72
AC064805.1	2.92419e-76	-1.50575	0.029	0.113	6.10424e-72
GPAT3	3.58876e-76	1.33649	0.426	0.352	7.49154e-72
AHSA1	3.73084e-76	-0.816716	0.062	0.167	7.78813e-72
CTDSP1	4.91572e-76	0.741142	0.618	0.62	1.02616e-71
EIF5	6.26608e-76	0.462828	0.779	0.816	1.30804e-71
FDPS	7.1453e-76	-0.429977	0.146	0.292	1.49158e-71
FBXL5	7.33447e-76	0.497596	0.784	0.834	1.53107e-71
OTUB1	7.90566e-76	-0.299917	0.384	0.6	1.65031e-71
TMSB10	8.4684e-76	-0.136791	0.998	0.985	1.76778e-71
ALG3	8.62634e-76	-0.748734	0.074	0.185	1.80075e-71
AL691403.1	1.05046e-75	0.7747	0.58	0.537	2.19283e-71
SPTSSA	1.06517e-75	-0.58669	0.124	0.257	2.22354e-71
DAZAP2	1.30423e-75	-0.238667	0.792	0.914	2.72258e-71
FDFT1	1.31072e-75	-0.414008	0.181	0.339	2.73612e-71
RPIA	1.42271e-75	-0.643213	0.09	0.21	2.96992e-71
TOMM40	1.44844e-75	-0.727204	0.078	0.191	3.02361e-71
SNHG16	1.77831e-75	-0.535332	0.144	0.284	3.71222e-71
POLR3GL	2.12433e-75	-0.526552	0.144	0.285	4.43454e-71
MMADHC	2.30889e-75	-0.473758	0.165	0.315	4.81981e-71
JAGN1	2.3535e-75	-0.755567	0.083	0.197	4.91293e-71
ELMO1	2.48019e-75	0.639261	0.641	0.64	5.1774e-71
HDAC4	2.50622e-75	0.972615	0.437	0.364	5.23173e-71
SPSB1	2.76087e-75	1.73925	0.172	0.089	5.76331e-71
RLF	3.31452e-75	0.73384	0.532	0.49	6.91906e-71
CREG1	3.90523e-75	-0.360363	0.315	0.503	8.15216e-71
TRAPPC3	4.02398e-75	-0.426003	0.159	0.309	8.40006e-71
MAGED2	4.38036e-75	-1.20105	0.04	0.131	9.14399e-71
ADAM17	4.75527e-75	0.695295	0.564	0.534	9.92663e-71
LYSMD2	5.31154e-75	-0.579411	0.122	0.254	1.10878e-70
NSMCE1	6.43061e-75	-0.522119	0.129	0.266	1.34239e-70
MLX	7.87006e-75	-0.351584	0.216	0.385	1.64288e-70
AKR1B1	7.89652e-75	-0.788444	0.08	0.193	1.6484e-70
SRP72	8.44896e-75	-0.325274	0.262	0.447	1.76372e-70
WDR18	8.68813e-75	-0.815437	0.06	0.165	1.81365e-70
ALDH1A2	9.99009e-75	1.24991	0.287	0.195	2.08543e-70
STX1A	1.09017e-74	1.79955	0.132	0.06	2.27574e-70
SNRPF	1.34043e-74	-0.344978	0.312	0.504	2.79814e-70
SLIRP	1.39881e-74	-0.340836	0.321	0.522	2.92001e-70
SLC25A1	1.45064e-74	-0.51399	0.13	0.266	3.02821e-70
RELT	1.46819e-74	0.732747	0.579	0.562	3.06484e-70
CHPT1	1.86997e-74	-0.368754	0.208	0.374	3.90357e-70
AGPAT2	2.11027e-74	-0.372044	0.223	0.395	4.4052e-70
C1orf122	2.21152e-74	-0.482214	0.141	0.281	4.61654e-70
SS18L2	2.60658e-74	-0.451763	0.142	0.282	5.44123e-70
TRAPPC2L	2.92329e-74	-0.422384	0.176	0.329	6.10237e-70
PCGF5	2.989e-74	-0.36189	0.347	0.543	6.23954e-70
ARHGAP1	3.10157e-74	-0.599342	0.133	0.268	6.47453e-70
LYN	4.17048e-74	0.065547	0.974	0.983	8.70587e-70
CUTA	4.40095e-74	-0.287987	0.349	0.554	9.18698e-70
CLEC2B	5.18182e-74	-0.329691	0.389	0.59	1.08171e-69
PLEKHG2	5.3612e-74	1.09307	0.404	0.319	1.11915e-69
CNPY3	5.8363e-74	-0.260962	0.68	0.862	1.21833e-69
LSM7	6.13426e-74	-0.296703	0.461	0.676	1.28053e-69
NTAN1	7.45597e-74	-0.686097	0.087	0.202	1.55643e-69
FBXO34	7.77438e-74	0.799405	0.521	0.475	1.6229e-69
GLT1D1	8.87751e-74	0.790554	0.494	0.422	1.85318e-69
USP34	8.98765e-74	0.627545	0.592	0.576	1.87617e-69
MTCH2	9.25169e-74	-0.324195	0.18	0.337	1.93129e-69
IRAK3	9.34537e-74	0.512242	0.751	0.781	1.95085e-69
RALB	9.46594e-74	-0.370091	0.243	0.42	1.97601e-69
TMEM203	1.04099e-73	-0.845219	0.059	0.161	2.17306e-69
LARS	1.10801e-73	-0.544929	0.111	0.237	2.31297e-69
TPRKB	1.11578e-73	-0.616784	0.101	0.223	2.32919e-69
MRPS11	1.25141e-73	-0.74206	0.075	0.186	2.61232e-69
CCDC107	1.29543e-73	-0.627885	0.092	0.21	2.70422e-69
FMNL1	1.3736e-73	0.397828	0.837	0.887	2.86739e-69
FOXN3	1.57698e-73	0.432624	0.804	0.841	3.29194e-69
USP9X	1.65877e-73	0.743519	0.537	0.509	3.46269e-69
LTB	1.68352e-73	-0.727522	0.116	0.24	3.51436e-69
BAG1	1.70097e-73	-0.328263	0.293	0.484	3.55078e-69
TXNDC12	1.88809e-73	-0.389649	0.203	0.366	3.94139e-69
FH	2.15866e-73	-1.06633	0.042	0.135	4.50621e-69
GSDMD	2.23552e-73	-0.421778	0.164	0.313	4.66664e-69
TSPO	3.2109e-73	-0.243054	0.951	0.956	6.70276e-69
NOSIP	3.56713e-73	-0.379486	0.165	0.318	7.44638e-69
PHACTR1	3.87465e-73	0.817558	0.543	0.49	8.08833e-69
SSU72	4.81466e-73	-0.307226	0.395	0.608	1.00506e-68
QDPR	6.61603e-73	-1.04518	0.044	0.137	1.3811e-68
UROD	7.46023e-73	-0.594025	0.102	0.225	1.55732e-68
MAF1	8.39806e-73	-0.357597	0.257	0.433	1.75309e-68
TNFSF13	9.47959e-73	-0.326241	0.427	0.634	1.97886e-68
GLMP	1.00733e-72	-0.730731	0.093	0.209	2.10281e-68
WAC-AS1	1.01821e-72	-0.429812	0.195	0.349	2.12552e-68
WDR45	1.28454e-72	-0.426212	0.17	0.319	2.68147e-68
EP300	1.30392e-72	0.571081	0.622	0.618	2.72193e-68
THOC7	2.13868e-72	-0.30373	0.231	0.406	4.4645e-68
IRF2	2.20755e-72	-0.428923	0.161	0.305	4.60827e-68
SHOC2	2.44197e-72	0.56383	0.655	0.659	5.09761e-68
MRPL3	2.4537e-72	-0.519558	0.12	0.25	5.12209e-68
STUB1	2.95503e-72	-0.323692	0.291	0.483	6.16863e-68
IER3IP1	3.3813e-72	-0.401035	0.168	0.318	7.05847e-68
CHURC1	4.13873e-72	-0.31611	0.334	0.53	8.63959e-68
SMIM26	4.67918e-72	-0.322304	0.301	0.489	9.7678e-68
GNA13	4.89488e-72	0.553534	0.675	0.687	1.02181e-67
ORMDL2	5.39264e-72	-0.628832	0.086	0.2	1.12571e-67
PSMB7	5.62148e-72	-0.317649	0.28	0.468	1.17348e-67
GNGT2	6.52531e-72	-1.61696	0.022	0.099	1.36216e-67
CDC123	6.66586e-72	-0.508563	0.126	0.258	1.3915e-67
UPP1	6.67756e-72	0.56014	0.705	0.723	1.39394e-67
KLHDC3	8.25366e-72	-0.535147	0.106	0.23	1.72295e-67
SPATA13	8.41531e-72	0.897721	0.467	0.409	1.7567e-67
C15orf39	9.44941e-72	-0.373135	0.38	0.572	1.97256e-67
EIF3I	9.91005e-72	-0.298241	0.359	0.565	2.06872e-67
RABGGTA	1.00829e-71	-0.614078	0.083	0.197	2.10481e-67
SSBP4	1.08618e-71	-0.341381	0.319	0.512	2.26739e-67
GBP1	1.29036e-71	-0.62767	0.146	0.276	2.69363e-67
TMEM208	1.44451e-71	-0.39374	0.161	0.308	3.01541e-67
ADH5	1.70366e-71	-0.572855	0.112	0.237	3.55638e-67
DSTN	1.84573e-71	-0.447346	0.207	0.364	3.85297e-67
PKN2	2.29023e-71	0.694573	0.57	0.548	4.78084e-67
SYNC	2.67553e-71	-1.14611	0.036	0.123	5.58516e-67
RPS6KB2	3.53493e-71	-0.421987	0.155	0.299	7.37918e-67
NUDT5	4.09902e-71	-0.629556	0.086	0.199	8.5567e-67
SNX29	4.11427e-71	0.726514	0.559	0.531	8.58853e-67
NDEL1	4.26937e-71	0.811803	0.511	0.472	8.9123e-67
ZNF296	4.59094e-71	-1.30662	0.028	0.108	9.58359e-67
SLC22A4	4.63221e-71	1.17284	0.311	0.224	9.66974e-67
LSM1	5.578e-71	-0.513397	0.115	0.242	1.16441e-66
NABP1	6.28344e-71	1.12751	0.346	0.261	1.31167e-66
ABHD14B	6.72492e-71	-0.549448	0.118	0.244	1.40383e-66
HIPK2	7.81555e-71	0.74551	0.567	0.549	1.6315e-66
LAMTOR5	8.79402e-71	-0.286225	0.398	0.616	1.83575e-66
FAM117B	1.37257e-70	-0.74569	0.156	0.292	2.86525e-66
CYB5R3	2.11328e-70	-0.363049	0.284	0.465	4.41147e-66
MRPS6	2.40027e-70	-0.493141	0.132	0.264	5.01055e-66
EXOSC6	2.67015e-70	-0.549232	0.112	0.235	5.57393e-66
45353	3.62185e-70	-0.352683	0.23	0.399	7.56062e-66
MEAF6	3.78937e-70	-0.355713	0.17	0.319	7.9103e-66
UBE2I	3.85495e-70	-0.272826	0.436	0.65	8.04722e-66
PYCR2	4.86716e-70	-0.677382	0.066	0.169	1.01602e-65
PSMB5	5.24044e-70	-0.914219	0.058	0.155	1.09394e-65
PABPC4	5.36731e-70	-0.35708	0.327	0.513	1.12043e-65
CSTA	5.54924e-70	-0.293321	0.768	0.882	1.1584e-65
ICAM4	5.55957e-70	-1.66934	0.026	0.103	1.16056e-65
CCT2	6.50614e-70	-0.415918	0.168	0.314	1.35816e-65
RC3H1	6.56688e-70	0.62459	0.614	0.617	1.37084e-65
PPP1R11	6.57545e-70	-0.361991	0.201	0.362	1.37263e-65
ATP6V0A1	7.00086e-70	0.9125	0.432	0.366	1.46143e-65
ZDHHC20	7.14399e-70	0.526057	0.687	0.696	1.49131e-65
CNPY2	8.40613e-70	-0.355372	0.209	0.37	1.75478e-65
MGLL	8.95799e-70	-1.07342	0.071	0.172	1.86998e-65
GOLGA7	9.36797e-70	-0.343064	0.196	0.354	1.95556e-65
SYPL1	9.57991e-70	-0.430383	0.136	0.27	1.99981e-65
HHEX	9.60722e-70	-0.420811	0.172	0.318	2.00551e-65
KLF12	1.12061e-69	-1.45785	0.034	0.116	2.33928e-65
TIMM10	1.30011e-69	-0.481248	0.117	0.242	2.71399e-65
TRMT112	1.36313e-69	-0.266618	0.418	0.631	2.84553e-65
MCRIP2	1.40374e-69	-0.474601	0.147	0.283	2.9303e-65
LETMD1	1.48587e-69	-0.698882	0.078	0.185	3.10174e-65
PPCS	2.00332e-69	-0.304195	0.262	0.442	4.18193e-65
DHPS	2.58909e-69	-0.443932	0.136	0.27	5.40473e-65
NSL1	2.81801e-69	-0.602956	0.084	0.195	5.88259e-65
DUSP23	2.94535e-69	-0.372243	0.208	0.367	6.14842e-65
RAB5IF	3.0341e-69	-0.303074	0.549	0.748	6.33368e-65
AK2	3.90706e-69	-0.38987	0.175	0.324	8.15598e-65
MRPL37	4.08308e-69	-0.56436	0.097	0.213	8.52343e-65
WBP1	5.18592e-69	-0.474055	0.139	0.273	1.08256e-64
CHCHD1	5.53898e-69	-0.539939	0.109	0.231	1.15626e-64
EDF1	6.47119e-69	-0.262321	0.629	0.82	1.35086e-64
HINT2	6.5067e-69	-0.452444	0.138	0.272	1.35827e-64
UQCC2	7.66216e-69	-0.571114	0.09	0.203	1.59948e-64
BTF3L4	8.90682e-69	-0.37725	0.207	0.367	1.8593e-64
INO80E	9.12882e-69	-0.500234	0.127	0.256	1.90564e-64
NUDT1	9.2198e-69	-0.425993	0.151	0.289	1.92463e-64
PPM1M	9.27147e-69	-0.390856	0.202	0.357	1.93542e-64
SLC39A1	1.05386e-68	-0.711552	0.067	0.169	2.19994e-64
EIF2A	1.46525e-68	-0.305234	0.277	0.46	3.0587e-64
MRPL24	1.51598e-68	-0.712097	0.072	0.176	3.16461e-64
POLE4	1.5391e-68	-0.240747	0.409	0.623	3.21288e-64
ZDHHC1	1.88727e-68	-0.605419	0.11	0.228	3.93967e-64
STARD7	2.1361e-68	-0.36201	0.228	0.39	4.45912e-64
SNRPB2	2.67756e-68	-0.28616	0.261	0.439	5.58941e-64
MRPL38	3.41313e-68	-0.57246	0.099	0.215	7.12491e-64
CALM3	4.3372e-68	-0.288974	0.511	0.716	9.05391e-64
NDUFS6	4.54124e-68	-0.261694	0.424	0.64	9.47983e-64
SF3A1	5.1246e-68	-0.333738	0.244	0.413	1.06976e-63
CD40	5.47315e-68	-1.09916	0.042	0.129	1.14252e-63
EMC10	6.20623e-68	-0.332823	0.23	0.396	1.29555e-63
ARSA	6.49865e-68	-0.477333	0.115	0.238	1.35659e-63
RSU1	7.96846e-68	-0.331042	0.169	0.316	1.66342e-63
DNAJC19	9.47259e-68	-0.635242	0.074	0.179	1.9774e-63
B3GAT3	9.59946e-68	-0.492205	0.107	0.226	2.00389e-63
MYD88	1.05038e-67	-0.324609	0.442	0.637	2.19266e-63
PRADC1	1.07299e-67	-1.40815	0.03	0.109	2.23987e-63
SSR1	1.11498e-67	-0.313234	0.276	0.457	2.32751e-63
PDIA3	1.62023e-67	-0.284157	0.575	0.763	3.38222e-63
TOR3A	1.64727e-67	-0.521205	0.095	0.209	3.43868e-63
NOP10	1.71243e-67	-0.291962	0.555	0.754	3.57469e-63
RNF24	2.30312e-67	0.888427	0.48	0.429	4.80776e-63
ILF2	2.54407e-67	-0.282818	0.261	0.44	5.31075e-63
PCK2	3.00374e-67	-0.905817	0.045	0.132	6.27031e-63
POMP	3.10368e-67	-0.251488	0.523	0.73	6.47893e-63
NUDT16L1	3.24385e-67	-0.682691	0.073	0.177	6.77153e-63
HAUS4	3.41097e-67	-0.48579	0.132	0.259	7.1204e-63
ZNF580	3.44685e-67	-0.456657	0.154	0.29	7.19531e-63
BLOC1S4	3.53658e-67	-0.942697	0.048	0.137	7.3826e-63
APOBEC3C	3.61222e-67	-0.571631	0.117	0.238	7.54051e-63
ITM2B	3.8894e-67	-0.203626	0.954	0.974	8.11913e-63
NUBP2	4.06959e-67	-0.478048	0.11	0.23	8.49528e-63
ARHGAP15	4.71388e-67	0.523177	0.668	0.684	9.84023e-63
CANX	4.83319e-67	-0.287157	0.536	0.737	1.00893e-62
GTF3A	5.59971e-67	-0.327387	0.357	0.551	1.16894e-62
PSENEN	6.19645e-67	-0.283619	0.297	0.486	1.29351e-62
CNOT7	7.7455e-67	-0.370432	0.19	0.34	1.61687e-62
THYN1	7.87973e-67	-0.685971	0.078	0.183	1.64489e-62
KIF1B	1.01367e-66	0.718818	0.513	0.47	2.11603e-62
PDAP1	1.10292e-66	-0.322539	0.204	0.361	2.30235e-62
UBE2R2	1.34232e-66	0.39732	0.8	0.85	2.80208e-62
BID	1.39017e-66	-0.298269	0.586	0.775	2.90199e-62
DELE1	1.47278e-66	-0.371159	0.188	0.338	3.07444e-62
NUDCD2	1.61584e-66	-0.728694	0.073	0.175	3.37306e-62
TECR	1.93953e-66	-0.379417	0.158	0.298	4.04878e-62
ZDHHC24	2.7796e-66	-0.621361	0.086	0.195	5.80241e-62
MRPS23	2.86257e-66	-0.746405	0.068	0.167	5.97561e-62
IFNGR1	3.2634e-66	0.524065	0.688	0.718	6.81235e-62
RBMX	3.31778e-66	-0.307247	0.271	0.447	6.92587e-62
MCUR1	3.93818e-66	-0.669945	0.083	0.189	8.22094e-62
DNPEP	4.29173e-66	-0.410846	0.145	0.278	8.959e-62
C3AR1	4.65974e-66	-0.681133	0.116	0.232	9.7272e-62
GIMAP2	4.7288e-66	-0.582704	0.097	0.209	9.87138e-62
ITGB1BP1	4.76111e-66	-0.359278	0.163	0.304	9.93883e-62
FAM157C	6.03646e-66	1.03079	0.342	0.26	1.26011e-61
PIH1D1	6.18365e-66	-0.384131	0.143	0.277	1.29084e-61
HLA-F	6.66236e-66	-0.295724	0.516	0.708	1.39077e-61
DCTD	6.69509e-66	-0.671165	0.073	0.175	1.3976e-61
RRAGC	7.53961e-66	-0.63193	0.085	0.193	1.57389e-61
NIPSNAP3A	7.70876e-66	-0.456013	0.114	0.234	1.6092e-61
SP110	8.63595e-66	-0.306488	0.347	0.535	1.80275e-61
FBXW5	8.8348e-66	-0.292898	0.241	0.412	1.84426e-61
AURKAIP1	9.90179e-66	-0.254519	0.461	0.677	2.067e-61
ATP6V1F	1.06337e-65	-0.254169	0.644	0.835	2.21979e-61
PREX1	1.24389e-65	0.489282	0.706	0.745	2.59662e-61
LINC02432	1.24501e-65	-1.20522	0.057	0.147	2.59897e-61
BCL6	1.2519e-65	0.604491	0.656	0.664	2.61334e-61
TOR2A	1.33551e-65	-0.379733	0.169	0.311	2.78787e-61
ZFAND1	1.44702e-65	-0.77979	0.068	0.165	3.02066e-61
CYFIP2	1.86712e-65	-0.75053	0.136	0.257	3.89761e-61
TXNIP	1.94522e-65	-0.319686	0.846	0.922	4.06065e-61
CHMP2A	2.26264e-65	-0.275669	0.404	0.607	4.72326e-61
JUP	2.46507e-65	-0.840223	0.066	0.163	5.14583e-61
PRELID3B	2.64245e-65	-0.657491	0.072	0.173	5.51612e-61
PRPF19	2.67367e-65	-0.574655	0.078	0.183	5.58129e-61
HDGF	3.51258e-65	-0.300806	0.278	0.453	7.33252e-61
METTL5	3.57469e-65	-0.668034	0.08	0.183	7.46217e-61
UCHL3	3.69329e-65	-0.488939	0.117	0.237	7.70974e-61
SNHG3	3.81788e-65	-0.537276	0.115	0.233	7.96982e-61
GPS2	5.46662e-65	-0.287009	0.297	0.481	1.14116e-60
SRD5A3	5.62633e-65	-1.15724	0.035	0.116	1.1745e-60
PITPNA	7.33551e-65	0.701918	0.57	0.56	1.53129e-60
PSMD2	7.46271e-65	-0.259937	0.219	0.38	1.55784e-60
AL135905.2	7.51611e-65	-0.4419	0.127	0.252	1.56899e-60
GLB1	7.51911e-65	-0.321607	0.206	0.362	1.56961e-60
TTC7A	7.53404e-65	0.69459	0.574	0.55	1.57273e-60
MFSD5	8.3527e-65	-0.765256	0.065	0.162	1.74363e-60
TAP2	9.15665e-65	-0.388238	0.19	0.338	1.91145e-60
SIRPA	1.03929e-64	0.640641	0.559	0.522	2.16952e-60
DGKD	1.15459e-64	0.882426	0.45	0.396	2.41021e-60
POP5	1.30693e-64	-0.535607	0.087	0.194	2.72822e-60
ITGB2	1.42024e-64	-0.173425	0.944	0.971	2.96475e-60
UIMC1	1.75618e-64	0.833844	0.467	0.414	3.66603e-60
SNAP23	1.77214e-64	-0.331993	0.25	0.417	3.69934e-60
CASP4	1.81928e-64	-0.272206	0.358	0.551	3.79775e-60
HMGN4	1.85367e-64	-0.383157	0.139	0.27	3.86954e-60
NELFE	2.17312e-64	-0.376223	0.162	0.3	4.53639e-60
CD82	2.27361e-64	1.10016	0.339	0.259	4.74616e-60
PIN4	2.94484e-64	-0.398671	0.136	0.264	6.14735e-60
MS4A6A	2.97526e-64	-0.380229	0.719	0.788	6.21087e-60
SUGT1	3.15618e-64	-0.312483	0.172	0.315	6.58852e-60
TET3	3.15765e-64	0.91318	0.426	0.365	6.59159e-60
SCAMP3	3.44586e-64	-0.52907	0.092	0.202	7.19323e-60
SRP19	3.69753e-64	-0.326966	0.179	0.323	7.71859e-60
RRP36	3.7295e-64	-0.522911	0.097	0.209	7.78534e-60
FKBP4	3.93776e-64	-0.787143	0.052	0.141	8.22008e-60
PSMD13	4.39941e-64	-0.260549	0.269	0.446	9.18377e-60
SF3A2	6.56013e-64	-0.277518	0.234	0.399	1.36943e-59
FCGR1A	9.27163e-64	-0.436094	0.256	0.409	1.93545e-59
TPGS2	1.02324e-63	-0.688141	0.074	0.173	2.13601e-59
BUD31	1.204e-63	-0.24804	0.286	0.468	2.51335e-59
SNED1	1.25055e-63	-2.08183	0.035	0.112	2.61052e-59
RAB4A	1.2889e-63	-0.327031	0.198	0.35	2.69058e-59
TPPP3	1.59293e-63	-1.02081	0.047	0.133	3.32524e-59
TMEM11	1.61248e-63	-0.581531	0.089	0.196	3.36605e-59
DCAF7	1.65654e-63	-0.32343	0.162	0.299	3.45803e-59
GPAA1	1.78376e-63	-0.334617	0.146	0.279	3.72359e-59
KIAA0232	1.83241e-63	0.783986	0.497	0.46	3.82515e-59
PAFAH1B1	2.14403e-63	0.492506	0.674	0.702	4.47567e-59
RNPEP	2.15074e-63	-0.262236	0.332	0.524	4.48967e-59
BECN1	2.62341e-63	-0.303981	0.187	0.336	5.47637e-59
NIPSNAP2	2.80754e-63	-0.267367	0.271	0.445	5.86074e-59
PSMB8-AS1	2.98267e-63	-0.427618	0.127	0.25	6.22633e-59
KLF2	3.35334e-63	-0.445422	0.739	0.853	7.00011e-59
TMEM35B	3.35571e-63	-0.564212	0.092	0.2	7.00504e-59
ESYT2	4.20097e-63	0.714773	0.544	0.53	8.76952e-59
MRPS33	4.61491e-63	-0.607407	0.072	0.171	9.63362e-59
PPP4C	4.91324e-63	-0.26279	0.483	0.694	1.02564e-58
MRPL12	5.65559e-63	-0.481285	0.1	0.211	1.1806e-58
MVP	6.01139e-63	-0.255367	0.357	0.546	1.25488e-58
PSMA1	6.58576e-63	-0.281339	0.4	0.598	1.37478e-58
CD1C	7.36989e-63	-3.08724	0.013	0.074	1.53846e-58
MXD4	8.2268e-63	-0.299717	0.266	0.439	1.71734e-58
MAD2L2	8.68309e-63	-0.373484	0.161	0.296	1.8126e-58
ASCL2	8.71248e-63	-0.53122	0.129	0.25	1.81873e-58
CDIPT	8.72297e-63	-0.376034	0.15	0.283	1.82092e-58
RNPEPL1	9.70028e-63	-0.275169	0.336	0.528	2.02493e-58
CRYL1	1.06279e-62	-0.489517	0.101	0.213	2.21857e-58
EIF4E2	1.07823e-62	-0.25445	0.384	0.584	2.2508e-58
ATP6AP1	1.10094e-62	-0.266245	0.274	0.452	2.29822e-58
NUB1	1.20992e-62	-0.354779	0.187	0.332	2.5257e-58
FTX	1.21999e-62	0.90816	0.407	0.339	2.54672e-58
TNFAIP8L2	1.4997e-62	-0.641101	0.074	0.173	3.13063e-58
UNC93B1	1.68682e-62	-0.272698	0.363	0.557	3.52124e-58
CCNQ	1.70183e-62	-0.69428	0.071	0.169	3.55258e-58
RAB4B	1.87575e-62	-0.299579	0.204	0.357	3.91562e-58
CD151	1.93162e-62	-0.318143	0.215	0.369	4.03226e-58
PRCP	2.06585e-62	-0.298871	0.26	0.426	4.31246e-58
TNFSF12	2.13232e-62	-0.29483	0.29	0.462	4.45122e-58
G6PD	2.58392e-62	-0.283309	0.301	0.481	5.39393e-58
AC007384.1	3.42461e-62	1.06531	0.358	0.283	7.14887e-58
C18orf32	3.62348e-62	-0.280947	0.299	0.478	7.56402e-58
PTP4A3	4.27816e-62	-1.94589	0.015	0.078	8.93067e-58
IRS2	4.40367e-62	0.801623	0.481	0.424	9.19265e-58
EEF1E1	4.43552e-62	-0.803623	0.058	0.147	9.25915e-58
TBCA	5.15707e-62	-0.237749	0.483	0.694	1.07654e-57
CPNE1	5.50428e-62	-0.321332	0.198	0.346	1.14902e-57
CCNG1	5.56218e-62	-0.592007	0.082	0.184	1.1611e-57
SMURF1	5.79358e-62	0.750722	0.483	0.439	1.20941e-57
ACTR1A	6.31678e-62	-0.3163	0.177	0.319	1.31863e-57
LY96	6.55703e-62	-0.306345	0.283	0.454	1.36878e-57
FBXL15	6.99648e-62	-0.352037	0.138	0.264	1.46052e-57
CHCHD5	7.42014e-62	-0.26154	0.279	0.454	1.54895e-57
MRPL20	8.78723e-62	-0.251158	0.316	0.5	1.83433e-57
GPR108	9.08222e-62	-0.370633	0.143	0.272	1.89591e-57
COX6B1	9.51277e-62	-0.192042	0.855	0.938	1.98579e-57
COPE	1.0633e-61	-0.244697	0.618	0.813	2.21965e-57
PA2G4	1.17493e-61	-0.269652	0.338	0.525	2.45266e-57
DGUOK	1.19392e-61	-0.259964	0.26	0.431	2.49231e-57
IER5	1.49407e-61	-0.337457	0.359	0.533	3.11887e-57
CLEC10A	1.91516e-61	-2.2357	0.026	0.096	3.99789e-57
TSTD1	1.9338e-61	-0.823539	0.052	0.138	4.03681e-57
ABR	2.07246e-61	0.641269	0.548	0.528	4.32625e-57
NMI	2.15029e-61	-0.374026	0.166	0.301	4.48873e-57
ZDHHC12	2.1673e-61	-0.361617	0.151	0.283	4.52424e-57
SNX18	2.3625e-61	-0.433136	0.244	0.392	4.93171e-57
RAB34	2.43197e-61	-0.434505	0.148	0.275	5.07674e-57
GLO1	2.93108e-61	-0.423147	0.122	0.241	6.11862e-57
TBC1D23	3.26273e-61	0.911526	0.409	0.349	6.81094e-57
E2F4	3.31902e-61	-0.2868	0.186	0.331	6.92846e-57
MZT1	3.36738e-61	-0.781632	0.057	0.146	7.0294e-57
BABAM1	3.52302e-61	-0.265503	0.206	0.361	7.3543e-57
STK32C	3.66662e-61	-0.482256	0.109	0.222	7.65406e-57
LMNB2	3.81745e-61	-0.791869	0.054	0.141	7.96892e-57
CENPX	3.86293e-61	-0.320328	0.173	0.314	8.06387e-57
CNDP2	4.08381e-61	-0.338625	0.184	0.325	8.52496e-57
NUCB1	4.1045e-61	-0.251459	0.368	0.558	8.56814e-57
NCL	4.5489e-61	-0.274625	0.604	0.782	9.49582e-57
PSMD10	5.2028e-61	-0.83388	0.044	0.126	1.08609e-56
PTRHD1	6.01179e-61	-0.333018	0.291	0.459	1.25496e-56
GNS	7.25502e-61	-0.2968	0.324	0.502	1.51449e-56
RSRP1	8.66031e-61	0.543908	0.661	0.672	1.80784e-56
NFKBID	8.77876e-61	0.83698	0.467	0.416	1.83257e-56
C12orf10	8.90083e-61	-0.38632	0.149	0.277	1.85805e-56
DTD1	9.32287e-61	-0.464258	0.106	0.218	1.94615e-56
KDM4B	1.13962e-60	0.792937	0.47	0.423	2.37896e-56
RELB	1.22391e-60	0.588576	0.671	0.697	2.55491e-56
TRIAP1	1.30546e-60	-0.989792	0.04	0.119	2.72514e-56
ISCA2	1.37572e-60	-0.80605	0.053	0.14	2.87181e-56
CYB561A3	1.51223e-60	-0.464748	0.103	0.214	3.15679e-56
RBM25	1.54799e-60	0.478575	0.676	0.698	3.23143e-56
PSMA3	1.57154e-60	-0.25049	0.227	0.386	3.28059e-56
SLC52A2	1.65088e-60	-0.568266	0.068	0.162	3.4462e-56
RBM38	1.70613e-60	-0.456574	0.12	0.237	3.56156e-56
NFU1	1.73865e-60	-0.819153	0.054	0.14	3.62943e-56
TIPRL	1.90378e-60	-0.379769	0.115	0.231	3.97413e-56
BCAP29	2.31168e-60	-0.410163	0.123	0.241	4.82564e-56
SNRPG	2.42872e-60	-0.230988	0.411	0.614	5.06996e-56
SUMF2	2.93387e-60	-0.366173	0.142	0.268	6.12446e-56
SLC35D2	3.53823e-60	-0.699362	0.077	0.173	7.38606e-56
HDDC2	3.89194e-60	-0.634364	0.078	0.176	8.12442e-56
ATXN10	4.00858e-60	-0.326486	0.177	0.315	8.36792e-56
TXNDC17	4.06917e-60	-0.24834	0.339	0.531	8.4944e-56
ROGDI	4.32844e-60	-0.307206	0.229	0.385	9.03563e-56
HNRNPUL2	4.61026e-60	-0.244789	0.255	0.422	9.62391e-56
BCLAF1	4.63906e-60	0.460313	0.708	0.74	9.68403e-56
MIEN1	5.0132e-60	-0.271246	0.336	0.521	1.0465e-55
GSN	5.02545e-60	-0.387535	0.202	0.343	1.04906e-55
RETREG2	5.22912e-60	-0.440377	0.125	0.243	1.09158e-55
RFTN1	5.45057e-60	-0.450528	0.17	0.301	1.13781e-55
NDUFS5	5.59158e-60	-0.243668	0.568	0.765	1.16724e-55
ELF2	5.59507e-60	0.581674	0.634	0.651	1.16797e-55
TPP1	6.25858e-60	-0.23185	0.372	0.565	1.30648e-55
FUCA2	6.65745e-60	-0.278282	0.182	0.324	1.38974e-55
SAMM50	7.23675e-60	-0.611842	0.07	0.165	1.51067e-55
RUNX3	7.653e-60	-0.500846	0.182	0.313	1.59756e-55
SLC49A4	9.01561e-60	0.799933	0.483	0.439	1.88201e-55
CAMLG	1.10328e-59	-0.391843	0.18	0.317	2.30311e-55
PDIA4	1.21711e-59	-0.472333	0.101	0.208	2.54073e-55
GDE1	1.50648e-59	-0.577445	0.096	0.2	3.14478e-55
RPS6KA4	1.53538e-59	-0.28956	0.209	0.358	3.20511e-55
SLC44A2	1.7214e-59	-0.682361	0.15	0.267	3.59342e-55
RAF1	1.7799e-59	0.720662	0.512	0.487	3.71554e-55
TESC	2.11297e-59	-0.315757	0.318	0.487	4.41083e-55
ARF3	2.50784e-59	-0.266059	0.28	0.452	5.23512e-55
VAPA	2.87642e-59	0.460138	0.734	0.799	6.00453e-55
RPA3	2.97066e-59	-0.629656	0.067	0.159	6.20126e-55
FRAT2	3.27447e-59	-0.290392	0.226	0.38	6.83545e-55
C1orf174	3.30447e-59	-0.737979	0.055	0.141	6.89807e-55
JKAMP	3.44657e-59	-0.548344	0.082	0.182	7.19472e-55
PPP2R1A	3.56867e-59	-0.249473	0.306	0.484	7.4496e-55
PSMB4	3.64288e-59	-0.238228	0.305	0.485	7.60451e-55
STOM	3.77162e-59	-0.535502	0.073	0.168	7.87326e-55
PKM	3.96846e-59	-0.238145	0.799	0.9	8.28416e-55
HBEGF	4.38421e-59	0.62877	0.555	0.495	9.15205e-55
SNX20	4.58328e-59	-0.445043	0.135	0.256	9.56759e-55
CELF1	4.6205e-59	0.666289	0.551	0.534	9.6453e-55
UROS	5.18962e-59	-0.543419	0.087	0.189	1.08333e-54
ANKRD12	5.53596e-59	0.384645	0.718	0.743	1.15563e-54
DMAC1	5.67258e-59	-0.624125	0.081	0.178	1.18415e-54
RPUSD3	6.0949e-59	-0.785966	0.054	0.138	1.27231e-54
DEDD2	6.93526e-59	-0.307206	0.213	0.36	1.44774e-54
NT5C	7.12499e-59	-0.314873	0.151	0.28	1.48734e-54
POLR2I	8.74136e-59	-0.283709	0.175	0.312	1.82476e-54
SGMS2	8.79797e-59	1.06903	0.334	0.261	1.83658e-54
AKIRIN2	8.89601e-59	0.427365	0.758	0.796	1.85704e-54
SDF4	9.46188e-59	-0.229885	0.312	0.492	1.97517e-54
C17orf49	1.04585e-58	-0.249765	0.336	0.518	2.18321e-54
GYG1	1.05391e-58	-0.262636	0.206	0.354	2.20004e-54
GIMAP7	1.13196e-58	-0.583464	0.084	0.182	2.36298e-54
BASP1	1.31524e-58	0.88012	0.513	0.471	2.74557e-54
LAPTM4A	1.62319e-58	-0.27693	0.488	0.679	3.38842e-54
MPND	1.73067e-58	-0.654921	0.074	0.168	3.61277e-54
CHID1	1.89384e-58	-0.779028	0.058	0.146	3.95339e-54
TIMM8B	1.93783e-58	-0.211299	0.288	0.463	4.04522e-54
CAPN1	2.2346e-58	-0.278584	0.199	0.345	4.66473e-54
PHF5A	2.45222e-58	-0.359355	0.156	0.285	5.11901e-54
ABT1	3.05759e-58	-0.426536	0.104	0.213	6.38272e-54
DUSP12	3.84792e-58	-0.737197	0.061	0.149	8.03254e-54
NDUFA5	3.95965e-58	-0.308183	0.155	0.285	8.26576e-54
MED10	4.79893e-58	-0.281251	0.219	0.37	1.00178e-53
TAF15	5.07335e-58	-0.240018	0.301	0.477	1.05906e-53
SRSF4	5.19367e-58	0.536564	0.623	0.641	1.08418e-53
BUB3	5.20596e-58	-0.409838	0.132	0.251	1.08675e-53
NDUFC2	5.49245e-58	-0.243477	0.515	0.715	1.14655e-53
RAB24	6.28631e-58	-0.247533	0.474	0.669	1.31227e-53
SIDT2	7.08353e-58	-0.518596	0.157	0.28	1.47869e-53
MRPL47	7.29938e-58	-0.37304	0.144	0.268	1.52375e-53
AL139246.5	7.39974e-58	-0.743233	0.066	0.154	1.5447e-53
FDX1	8.25063e-58	-0.303221	0.173	0.308	1.72232e-53
MYOF	8.75324e-58	-0.447451	0.22	0.358	1.82724e-53
SCRN1	8.75572e-58	-0.890581	0.065	0.153	1.82776e-53
RRAGA	8.83685e-58	-0.508402	0.081	0.179	1.84469e-53
MPST	8.89333e-58	-0.396612	0.151	0.275	1.85648e-53
COQ4	9.77367e-58	-0.541344	0.075	0.17	2.04025e-53
ALDH9A1	9.81046e-58	-0.542698	0.076	0.171	2.04793e-53
FKBP3	9.82554e-58	-0.374527	0.124	0.24	2.05108e-53
LMTK2	1.02068e-57	1.12144	0.312	0.237	2.13067e-53
HAVCR2	1.0236e-57	0.976774	0.415	0.363	2.13677e-53
GGCT	1.13414e-57	-0.826982	0.062	0.149	2.36752e-53
PLPBP	1.20784e-57	-0.431121	0.113	0.224	2.52137e-53
PGM2	1.2691e-57	-0.644159	0.068	0.158	2.64925e-53
PEMT	1.27118e-57	-0.8606	0.046	0.125	2.65358e-53
MZT2B	1.40169e-57	-0.241498	0.495	0.691	2.92602e-53
BST1	1.41454e-57	-0.335212	0.313	0.475	2.95285e-53
DEGS1	1.42136e-57	-0.435395	0.118	0.231	2.96708e-53
PARL	1.44621e-57	-0.280266	0.211	0.36	3.01896e-53
FMNL2	1.53595e-57	-1.62949	0.052	0.132	3.2063e-53
METTL7A	1.62047e-57	-0.345346	0.142	0.264	3.38273e-53
TMEM243	1.63733e-57	-0.305627	0.149	0.274	3.41793e-53
POP4	2.08895e-57	-0.401133	0.106	0.214	4.36069e-53
STK16	2.14064e-57	-0.7309	0.061	0.148	4.4686e-53
NDUFV1	2.15476e-57	-0.211893	0.248	0.412	4.49807e-53
BORCS8	2.32324e-57	-0.492148	0.099	0.204	4.84976e-53
STMP1	2.33392e-57	-0.217454	0.482	0.686	4.87206e-53
NDUFB9	2.52e-57	-0.268161	0.557	0.754	5.2605e-53
RBBP4	2.75304e-57	-0.268024	0.291	0.465	5.74697e-53
BCKDK	2.87902e-57	-0.251418	0.206	0.354	6.00995e-53
IMP4	3.21178e-57	-0.370742	0.126	0.242	6.7046e-53
POLR2F	3.30037e-57	-0.244566	0.229	0.384	6.88951e-53
ARMC10	5.86193e-57	-0.461204	0.108	0.216	1.22368e-52
PIK3AP1	5.9742e-57	-0.322724	0.395	0.573	1.24711e-52
UGP2	7.01854e-57	-0.356468	0.13	0.248	1.46512e-52
HDAC3	7.05442e-57	-0.36909	0.129	0.246	1.47261e-52
ANKRD28	8.32089e-57	0.965946	0.371	0.297	1.73699e-52
ENSA	9.70417e-57	0.595071	0.683	0.724	2.02575e-52
IARS2	1.10006e-56	-0.331684	0.166	0.298	2.29638e-52
PPIH	1.14315e-56	-0.441625	0.098	0.202	2.38633e-52
LYZ	1.31353e-56	-0.330024	0.998	0.966	2.74199e-52
TSTA3	1.76895e-56	-0.550492	0.076	0.17	3.69268e-52
LMAN1	1.79594e-56	-0.603478	0.068	0.158	3.74902e-52
G6PC3	1.8441e-56	-0.615997	0.063	0.151	3.84955e-52
KIAA0930	2.05432e-56	-0.242735	0.312	0.486	4.28839e-52
DBNDD2	2.13068e-56	-0.859504	0.059	0.144	4.44779e-52
PPM1N	2.21975e-56	-1.59927	0.024	0.089	4.63373e-52
EMC8	2.24973e-56	-0.475792	0.105	0.211	4.69631e-52
NCBP2AS2	2.28553e-56	-0.321409	0.187	0.325	4.77104e-52
LYPLA1	2.4661e-56	-0.230451	0.316	0.496	5.14798e-52
PDE6D	2.71383e-56	-0.461654	0.08	0.175	5.66512e-52
EML4	2.85054e-56	0.454352	0.651	0.653	5.9505e-52
HTT	3.0713e-56	0.744597	0.489	0.452	6.41133e-52
MZT2A	3.34432e-56	-0.364449	0.131	0.248	6.98128e-52
IVD	3.40867e-56	-0.720966	0.059	0.144	7.1156e-52
SLC9A3R1	3.44029e-56	-0.260242	0.388	0.574	7.1816e-52
PECAM1	4.70936e-56	-0.52729	0.57	0.734	9.83079e-52
CASP5	5.03047e-56	-2.43827	0.008	0.061	1.05011e-51
USP25	5.53148e-56	0.583096	0.586	0.588	1.1547e-51
LNPEP	5.75051e-56	-0.414701	0.203	0.339	1.20042e-51
SNHG32	6.3845e-56	-0.348399	0.18	0.313	1.33276e-51
FLOT2	6.41261e-56	-0.269368	0.281	0.444	1.33863e-51
RNASEH2B	7.67517e-56	-0.317867	0.157	0.283	1.60219e-51
DPM2	8.67781e-56	-0.54459	0.079	0.174	1.81149e-51
CMPK1	8.74166e-56	-0.226114	0.284	0.454	1.82482e-51
TRAF7	8.77694e-56	-0.335176	0.13	0.247	1.83219e-51
HSD17B4	1.08055e-55	-0.360067	0.127	0.241	2.25565e-51
CHST2	1.17018e-55	-0.72473	0.069	0.158	2.44275e-51
CEBPG	1.19971e-55	-0.330603	0.179	0.313	2.50439e-51
ANAPC13	1.35487e-55	-0.394557	0.118	0.229	2.8283e-51
MRFAP1	1.44734e-55	-0.244206	0.227	0.38	3.02132e-51
ANTKMT	1.46325e-55	-0.270819	0.212	0.36	3.05454e-51
FAM174C	1.64413e-55	-0.23379	0.252	0.41	3.43212e-51
UBLCP1	1.65634e-55	-0.47312	0.09	0.189	3.4576e-51
TYMP	1.71119e-55	-0.222033	0.919	0.963	3.5721e-51
PRPF31	1.89615e-55	-0.346309	0.116	0.228	3.95822e-51
LRP1	1.92048e-55	0.410326	0.736	0.76	4.009e-51
PRKAR1A	1.92953e-55	-0.248103	0.317	0.492	4.02789e-51
ALG5	2.01327e-55	-0.498112	0.079	0.174	4.2027e-51
IL2RG	2.07538e-55	-0.447545	0.161	0.281	4.33235e-51
ETF1	2.24704e-55	0.542841	0.619	0.629	4.69069e-51
MYCBP	2.32342e-55	-0.309044	0.134	0.254	4.85014e-51
SVBP	2.52517e-55	-0.25467	0.22	0.368	5.2713e-51
EIF2AK1	2.60929e-55	-0.272421	0.187	0.325	5.4469e-51
ARID4B	2.68033e-55	0.538938	0.63	0.645	5.59518e-51
MGST2	2.76569e-55	-0.336774	0.151	0.274	5.77337e-51
IL18	2.85833e-55	-0.579488	0.096	0.195	5.96677e-51
AP3B1	3.12344e-55	0.560866	0.602	0.606	6.52019e-51
MRPS26	3.17804e-55	-0.559956	0.069	0.159	6.63416e-51
HEIH	3.22063e-55	-0.637051	0.067	0.155	6.72307e-51
C15orf61	3.29166e-55	-0.526149	0.091	0.19	6.87135e-51
SENP5	3.5436e-55	0.741536	0.483	0.45	7.39726e-51
TINF2	3.6087e-55	-0.394722	0.11	0.216	7.53317e-51
HSPA1A	4.25926e-55	-0.399585	0.134	0.246	8.89121e-51
ZFAND2B	4.27369e-55	-0.354702	0.137	0.254	8.92133e-51
NDUFC1	4.52398e-55	-0.205672	0.365	0.554	9.44382e-51
TRIR	4.52555e-55	-0.232981	0.666	0.834	9.44709e-51
MRPS2	5.522e-55	-0.602164	0.066	0.154	1.15272e-50
SPCS2	6.38902e-55	-0.199755	0.29	0.461	1.33371e-50
SEPHS2	6.83822e-55	-0.52008	0.068	0.158	1.42748e-50
DPP7	7.02601e-55	-0.216816	0.39	0.582	1.46668e-50
MRPL41	7.3234e-55	-0.225659	0.331	0.514	1.52876e-50
MRPL15	9.05353e-55	-0.769201	0.048	0.127	1.88992e-50
SCNM1	9.21205e-55	-0.258741	0.279	0.443	1.92302e-50
OCEL1	9.42299e-55	-0.467019	0.109	0.215	1.96705e-50
PPP1R15A	9.89138e-55	0.291606	0.883	0.91	2.06483e-50
MBNL1	1.0723e-54	0.30632	0.874	0.923	2.23842e-50
PTPN18	1.39361e-54	-0.263888	0.423	0.613	2.90916e-50
ANKHD1	1.40568e-54	0.538709	0.619	0.633	2.93436e-50
UPK3A	1.41642e-54	-0.720973	0.054	0.135	2.95678e-50
LRRC59	1.42206e-54	-0.275359	0.204	0.345	2.96855e-50
ATP5IF1	1.43155e-54	-0.182478	0.44	0.642	2.98835e-50
EPN1	1.43983e-54	-0.225323	0.356	0.542	3.00565e-50
MRPL10	1.55241e-54	-0.67073	0.064	0.15	3.24066e-50
MRPL33	1.55808e-54	-0.256661	0.341	0.517	3.25249e-50
MRPL9	1.74361e-54	-0.506532	0.083	0.177	3.63979e-50
FBXO6	1.91838e-54	-0.431184	0.109	0.214	4.00462e-50
AIG1	2.42467e-54	-0.989661	0.037	0.108	5.06151e-50
CKS1B	2.66243e-54	-1.69905	0.014	0.07	5.55783e-50
POP7	2.77045e-54	-0.637025	0.06	0.143	5.78332e-50
DNAJC8	2.85906e-54	-0.232839	0.36	0.544	5.96829e-50
ABHD17A	3.00113e-54	-0.237181	0.329	0.511	6.26486e-50
RPS19BP1	3.25959e-54	-0.224141	0.267	0.429	6.8044e-50
MAPK6	3.30669e-54	0.731549	0.487	0.455	6.90271e-50
SMARCE1	3.33555e-54	-0.293026	0.2	0.34	6.96296e-50
LINC02245	3.42252e-54	-0.950748	0.038	0.109	7.14452e-50
STAC3	3.69855e-54	-0.391028	0.132	0.246	7.72071e-50
MPLKIP	3.81808e-54	-0.347802	0.128	0.241	7.97024e-50
ABCE1	3.87981e-54	-0.528579	0.087	0.183	8.09911e-50
C9orf78	4.14009e-54	-0.246157	0.355	0.537	8.64243e-50
ITPRIP	4.20851e-54	0.832342	0.445	0.4	8.78526e-50
EBNA1BP2	4.4015e-54	-0.767115	0.06	0.143	9.18813e-50
HTATSF1	4.69063e-54	-0.324928	0.145	0.264	9.79168e-50
FOSL1	4.76177e-54	0.986276	0.34	0.267	9.94019e-50
RTCB	4.98142e-54	-0.357556	0.119	0.229	1.03987e-49
PLEKHM2	5.88181e-54	0.631037	0.588	0.602	1.22783e-49
CIB1	6.7551e-54	-0.223404	0.468	0.665	1.41013e-49
GTF2H5	7.05677e-54	-0.332744	0.129	0.242	1.4731e-49
MRPL58	8.14481e-54	-0.588566	0.076	0.167	1.70023e-49
SURF2	8.48031e-54	-0.484854	0.081	0.174	1.77027e-49
NINJ1	8.65769e-54	-0.278271	0.58	0.759	1.80729e-49
GNPTG	9.09237e-54	-0.204245	0.324	0.505	1.89803e-49
NOA1	9.40286e-54	-0.615007	0.069	0.157	1.96285e-49
FBP1	1.00781e-53	-0.303803	0.312	0.473	2.1038e-49
MGST1	1.06445e-53	-0.400492	0.271	0.412	2.22204e-49
TMEM69	1.06771e-53	-0.866072	0.04	0.112	2.22884e-49
CDC26	1.1532e-53	-0.367821	0.124	0.236	2.4073e-49
EXOSC1	1.36725e-53	-0.38192	0.116	0.225	2.85413e-49
RNASE6	1.36881e-53	-0.362446	0.257	0.401	2.85739e-49
ATP6AP2	1.38578e-53	-0.214483	0.484	0.676	2.89282e-49
AP3S1	1.4347e-53	-0.209998	0.296	0.468	2.99493e-49
SNAPC2	1.58663e-53	-0.48082	0.083	0.176	3.3121e-49
SHARPIN	1.72755e-53	-0.348554	0.152	0.273	3.60625e-49
SMIM20	1.79579e-53	-0.508902	0.087	0.182	3.74871e-49
TMEM173	2.12252e-53	-0.313177	0.175	0.301	4.43077e-49
JUN	2.15704e-53	0.521794	0.738	0.71	4.50283e-49
RPL22L1	2.24791e-53	-0.201503	0.378	0.569	4.6925e-49
PIGC	2.36033e-53	-0.517037	0.075	0.164	4.92718e-49
TSSC4	2.56922e-53	-0.313032	0.14	0.258	5.36324e-49
KANSL1-AS1	2.58698e-53	-0.52091	0.086	0.18	5.40031e-49
RUVBL2	3.36398e-53	-0.607188	0.064	0.15	7.02232e-49
HEG1	3.56769e-53	-1.22243	0.042	0.115	7.44756e-49
UQCRQ	3.79119e-53	-0.21092	0.605	0.796	7.91411e-49
BLOC1S2	3.92182e-53	-0.202478	0.246	0.404	8.1868e-49
CLK1	4.11013e-53	0.713613	0.488	0.46	8.57989e-49
SNN	4.62384e-53	-0.266744	0.271	0.433	9.65226e-49
MVB12A	4.69168e-53	-0.362643	0.115	0.222	9.79389e-49
MANBA	4.69811e-53	0.489331	0.669	0.709	9.8073e-49
PFDN4	4.70214e-53	-0.362337	0.12	0.229	9.81573e-49
PIGT	5.5235e-53	-0.302907	0.134	0.248	1.15303e-48
PPIE	6.93131e-53	-0.582313	0.063	0.147	1.44691e-48
RENBP	8.0052e-53	-0.422756	0.133	0.245	1.67108e-48
HMOX2	8.49222e-53	-0.471566	0.086	0.18	1.77275e-48
ITPR2	8.56517e-53	0.665409	0.534	0.519	1.78798e-48
RELL1	8.73249e-53	0.763712	0.479	0.443	1.82291e-48
SNU13	8.76121e-53	-0.207748	0.46	0.661	1.8289e-48
SERPINB6	1.06004e-52	-0.193517	0.325	0.503	2.21284e-48
DISC1	1.061e-52	0.778409	0.477	0.444	2.21483e-48
TSN	1.21072e-52	-0.343208	0.11	0.216	2.52738e-48
SNRNP25	1.28161e-52	-0.588829	0.066	0.151	2.67535e-48
EREG	1.41778e-52	1.10783	0.339	0.257	2.95962e-48
UFD1	1.46232e-52	-0.249461	0.236	0.386	3.0526e-48
MRPS14	1.47372e-52	-0.867051	0.042	0.115	3.07639e-48
SORL1	1.63505e-52	0.669721	0.549	0.528	3.41316e-48
IFIT2	1.66761e-52	-0.964142	0.051	0.127	3.48115e-48
COX16	1.67713e-52	-0.219297	0.303	0.477	3.501e-48
CD101	1.99835e-52	-0.694332	0.059	0.14	4.17156e-48
UBE2F	2.02517e-52	-0.222638	0.287	0.453	4.22753e-48
HLA-E	2.03558e-52	-0.250413	0.923	0.972	4.24928e-48
SORBS3	2.28053e-52	-1.20583	0.023	0.084	4.7606e-48
COMMD5	2.43625e-52	-0.379893	0.122	0.229	5.08568e-48
NSMCE4A	2.49519e-52	-0.440749	0.103	0.204	5.2087e-48
SIRPB1	2.63876e-52	-0.252116	0.394	0.571	5.50842e-48
CYB5A	3.57294e-52	-0.910346	0.038	0.109	7.45852e-48
MARCO	3.92237e-52	-0.560381	0.136	0.243	8.18795e-48
FLT3LG	3.98206e-52	-0.73156	0.051	0.128	8.31254e-48
GNG10	4.00025e-52	-0.224716	0.324	0.496	8.35052e-48
LYPD2	4.02361e-52	-8.01801	0.001	0.043	8.39928e-48
CREBL2	4.08998e-52	-0.578684	0.081	0.172	8.53782e-48
SH3GLB2	4.09157e-52	-0.415015	0.103	0.204	8.54115e-48
ITGB1	4.42422e-52	0.553935	0.674	0.72	9.23556e-48
RBM15B	4.52037e-52	-0.37889	0.125	0.235	9.43627e-48
PAIP1	4.5589e-52	-0.40084	0.105	0.207	9.51671e-48
CFAP298	5.57859e-52	-0.568049	0.064	0.148	1.16453e-47
NCOR2	5.69428e-52	0.514359	0.637	0.662	1.18868e-47
NUDT2	5.90474e-52	-0.693705	0.056	0.135	1.23262e-47
LINC00667	6.15965e-52	-0.477678	0.083	0.175	1.28583e-47
SLC8A1	6.17352e-52	0.234535	0.79	0.835	1.28872e-47
MAP2K1	6.26152e-52	0.701728	0.589	0.602	1.30709e-47
GPN3	7.22621e-52	-0.772363	0.051	0.128	1.50847e-47
KCNMA1	8.31175e-52	-2.33508	0.015	0.07	1.73508e-47
MLEC	9.65603e-52	-0.255424	0.188	0.319	2.0157e-47
SDHA	1.03507e-51	-0.261252	0.207	0.345	2.16071e-47
VTI1B	1.05132e-51	-0.188657	0.303	0.473	2.19464e-47
HDHD5	1.05151e-51	-0.349371	0.116	0.222	2.19502e-47
ALDH3B1	1.13527e-51	-0.257616	0.217	0.36	2.36988e-47
CD244	1.14025e-51	-0.570908	0.075	0.163	2.38028e-47
GLOD4	1.17509e-51	-0.434817	0.103	0.203	2.453e-47
REX1BD	1.57724e-51	-0.207735	0.424	0.619	3.2925e-47
YRDC	1.62711e-51	-0.43425	0.087	0.18	3.3966e-47
ACP2	1.75837e-51	-1.03685	0.032	0.098	3.6706e-47
GNA12	2.0823e-51	0.769415	0.451	0.41	4.3468e-47
UBE2H	2.12383e-51	0.774763	0.463	0.432	4.4335e-47
DNM2	2.13887e-51	0.580168	0.594	0.607	4.46488e-47
CDK5	2.22232e-51	-0.598468	0.069	0.155	4.6391e-47
CCDC25	2.22379e-51	-0.640964	0.072	0.158	4.64217e-47
C8orf82	2.5353e-51	-0.573743	0.073	0.16	5.29244e-47
NUDC	2.54291e-51	-0.226718	0.23	0.379	5.30833e-47
FAM49A	2.60739e-51	0.267338	0.763	0.802	5.44294e-47
UBC	2.61143e-51	-0.159628	0.977	0.984	5.45136e-47
CCDC200	2.68398e-51	0.915307	0.488	0.44	5.60281e-47
VIM	2.84677e-51	-0.213593	0.995	0.989	5.94264e-47
FZD1	2.89148e-51	-1.13495	0.029	0.093	6.03597e-47
MRPS16	2.98452e-51	-0.351814	0.135	0.247	6.23018e-47
PCNP	3.04893e-51	-0.243871	0.295	0.461	6.36464e-47
TMEM101	3.36116e-51	-0.579782	0.06	0.141	7.01642e-47
HMGN3	3.44036e-51	-0.22681	0.424	0.616	7.18176e-47
DCK	3.57268e-51	-0.691997	0.055	0.133	7.45797e-47
OLA1	3.6385e-51	-0.215822	0.271	0.431	7.59538e-47
SMIM19	3.98248e-51	-0.333309	0.114	0.218	8.31342e-47
RFK	4.0671e-51	-0.617072	0.061	0.143	8.49006e-47
ZCRB1	4.09222e-51	-0.371617	0.117	0.222	8.54251e-47
DPY30	5.15934e-51	-0.369416	0.106	0.207	1.07701e-46
WARS	7.2074e-51	-0.476774	0.646	0.782	1.50454e-46
ERI3	8.18789e-51	-0.51854	0.074	0.161	1.70922e-46
GNPDA1	8.52411e-51	-0.661441	0.065	0.147	1.77941e-46
COPS7A	8.71753e-51	-0.338961	0.106	0.208	1.81978e-46
AC015912.3	8.98843e-51	0.848341	0.36	0.289	1.87634e-46
LAMP1	9.06787e-51	-0.233548	0.358	0.534	1.89292e-46
C14orf119	9.08999e-51	-0.754204	0.049	0.124	1.89754e-46
TNF	1.28418e-50	-0.775905	0.057	0.134	2.68072e-46
DDX49	1.60886e-50	-0.339467	0.119	0.224	3.3585e-46
PTGES2	1.70219e-50	-0.331865	0.1	0.199	3.55333e-46
LIX1L	1.71765e-50	-0.76324	0.047	0.121	3.58559e-46
NAGK	1.74738e-50	-0.216428	0.41	0.597	3.64766e-46
[truncated: 6,021 more rows]
